# Supplementary material for: Discovery of Cobimetinib as a novel A-FABP inhibitor using machine learning and molecular docking-based virtual screening
Source: Royal Society of Chemistry journal article supplement (doi:10.1039/d2ra01057g), 2022-01-01

Electronic Supplementary Information

Table S1. The detailed information of the training sets and test sets

| Molecule |               | Molecular |       | Smiles                                                                  | IC50    | Assay         | Target     |              | Type |
|----------|---------------|-----------|-------|-------------------------------------------------------------------------|---------|---------------|------------|--------------|------|
| No.      | ChEMBL ID     | Weight    | AlogP |                                                                         |         | ChEMBL ID     | ChEMBL ID  |              |      |
| 1        | CHEMBL3896829 | 427.4     | 4.51  | <chem>Cc1sc(NC(=O)C2=C(CCC2)C(=O)O)c(c3onc(n3)C(F)(F)F)c1C4CC4</chem>   | 10 nM   | CHEMBL3888563 | CHEMBL2083 | Training Set |      |
| 2        | CHEMBL3905766 | 345.38    | 3.18  | <chem>OC(=O)C1=C(CCC1)C(=O)Nc2sccc2c3onc(n3)C4CC4</chem>                | 10 nM   | CHEMBL3888563 | CHEMBL2083 | Training Set |      |
| 3        | CHEMBL3919426 | 373.43    | 3.8   | <chem>Cc1sc(NC(=O)C2=C(CCC2)C(=O)O)c(c1C)c3onc(n3)C4CC4</chem>          | 10 nM   | CHEMBL3888563 | CHEMBL2083 | Training Set |      |
| 4        | CHEMBL3915309 | 389.5     | 4.26  | <chem>Cc1sc(NC(=O)C2=C(CCC2)C(=O)O)c(c1C)c3nc(ns3)C4CC4</chem>          | 11 nM   | CHEMBL3888563 | CHEMBL2083 | Training Set |      |
| 5        | CHEMBL3923099 | 455.61    | 5.47  | <chem>Cc1c(sc(NC(=O)C2=C(C3CCC2CC3)C(=O)O)c1c4nc(ns4)C5CC5)C6CC6</chem> | 13 nM   | CHEMBL3888563 | CHEMBL2083 | Training Set |      |
| 6        | CHEMBL3914116 | 415.54    | 4.83  | <chem>Cc1c(sc(NC(=O)C2=C(CCC2)C(=O)O)c1c3nc(ns3)C4CC4)C5CC5</chem>      | 13 nM   | CHEMBL3888563 | CHEMBL2083 | Training Set |      |
| 7        | CHEMBL3964149 | 359.41    | 3.49  | <chem>Cc1esc(NC(=O)C2=C(CCC2)C(=O)O)c1c3onc(n3)C4CC4</chem>             | 15 nM   | CHEMBL3888563 | CHEMBL2083 | Training Set |      |
| 8        | CHEMBL3920664 | 429.57    | 5.22  | <chem>Cc1c(sc(NC(=O)C2=C(CCCC2)C(=O)O)c1c3nc(ns3)C4CC4)C5CC5</chem>     | 19 nM   | CHEMBL3888563 | CHEMBL2083 | Training Set |      |
| 9        | CHEMBL3903803 | 385.45    | 4.06  | <chem>OC(=O)C1=C(CCC1)C(=O)Nc2scc(C3CC3)c2c4onc(n4)C5CC5</chem>         | 19.2 nM | CHEMBL3888563 | CHEMBL2083 | Training Set |      |
| 10       | CHEMBL3979971 | 387.46    | 4.19  | <chem>Cc1sc(NC(=O)C2=C(CCCC2)C(=O)O)c(c1C)c3onc(n3)C4CC4</chem>         | 20 nM   | CHEMBL3888563 | CHEMBL2083 | Training Set |      |
| 11       | CHEMBL3896498 | 399.47    | 4.36  | <chem>Cc1sc(NC(=O)C2=C(CCC2)C(=O)O)c(c3onc(n3)C4CC4)c1C5CC5</chem>      | 20 nM   | CHEMBL3888563 | CHEMBL2083 | Training Set |      |
| 12       | CHEMBL3897486 | 413.38    | 4.2   | <chem>OC(=O)C1=C(CCC1)C(=O)Nc2scc(c2c3onc(n3)C4CC4)C(F)(F)F</chem>      | 20.5 nM | CHEMBL3888563 | CHEMBL2083 | Training Set |      |
| 13       | CHEMBL3919746 | 389.43    | 3.03  | <chem>Cc1sc(NC(=O)C2=C(COCC2)C(=O)O)c(c1C)c3onc(n3)C4CC4</chem>         | 21 nM   | CHEMBL3888563 | CHEMBL2083 | Training Set |      |
| 14       | CHEMBL3986878 | 377.49    | 4.09  | <chem>Cc1nsc(n1)c2c(C)c(C)sc2NC(=O)C3=C(CCCC3)C(=O)O</chem>             | 23 nM   | CHEMBL3888563 | CHEMBL2083 | Training Set |      |
| 15       | CHEMBL3950827 | 363.46    | 3.7   | <chem>Cc1nsc(n1)c2c(C)c(C)sc2NC(=O)C3=C(CCC3)C(=O)O</chem>              | 25 nM   | CHEMBL3888563 | CHEMBL2083 | Training Set |      |
| 16       | CHEMBL3920801 | 429.57    | 4.9   | <chem>Cc1sc(NC(=O)C2=C(C3CCC2CC3)C(=O)O)c(c1C)c4nc(ns4)C5CC5</chem>     | 27 nM   | CHEMBL3888563 | CHEMBL2083 | Training Set |      |
| 17       | CHEMBL3938613 | 429.57    | 4.9   | <chem>Cc1nsc(n1)c2c(C)c(sc2NC(=O)C3=C(C4CCC3CC4)C(=O)O)C5CC5</chem>     | 29 nM   | CHEMBL3888563 | CHEMBL2083 | Training Set |      |
| 18       | CHEMBL3891355 | 413.5     | 4.43  | <chem>Cc1sc(NC(=O)C2=C(C3CCC2CC3)C(=O)O)c(c1C)c4onc(n4)C5CC5</chem>     | 40 nM   | CHEMBL3888563 | CHEMBL2083 | Training Set |      |
| 19       | CHEMBL3981828 | 385.45    | 4.06  | <chem>OC(=O)C1=C(CCC1)C(=O)Nc2sc(cc2c3onc(n3)C4CC4)C5CC5</chem>         | 40.8 nM | CHEMBL3888563 | CHEMBL2083 | Training Set |      |
| 20       | CHEMBL460750  | 387.4     | 5.68  | <chem>OC(=O)c1cccc2c3CCCCc3n(Cc4cccc4C(F)(F)F)c12</chem>                | 49 nM   | CHEMBL964127  | CHEMBL2083 | Training Set |      |
| 21       | CHEMBL3953175 | 393.27    | 5.18  | <chem>OC(=O)C1(CCCC1)NC(=O)Nc2cc(Cl)cc(Cl)c2c3cccc3</chem>              | 50 nM   | CHEMBL3888115 | CHEMBL2083 | Training Set |      |
| 22       | CHEMBL3969505 | 348.76    | 3.88  | <chem>OC(=O)C1(CC1)NC(=O)Nc2cc(Cl)c(F)cc2c3cccc3</chem>                 | 60 nM   | CHEMBL3888115 | CHEMBL2083 | Training Set |      |
| 23       | CHEMBL516023  | 362.43    | 3.76  | <chem>NC(=O)c1cccc(Cn2c3CCCCc3c4cccc(C(=O)O)c24)c1</chem>               | 69 nM   | CHEMBL964127  | CHEMBL2083 | Training Set |      |
| 24       | CHEMBL3975095 | 373.43    | 3.8   | <chem>Cc1noc(n1)c2c(NC(=O)C3=C(CCC3)C(=O)O)sc(C)c2C4CC4</chem>          | 70 nM   | CHEMBL3888563 | CHEMBL2083 | Training Set |      |
| 25       | CHEMBL3916530 | 365.22    | 4.4   | <chem>OC(=O)C1(CC1)NC(=O)Nc2cc(Cl)cc(Cl)c2c3cccc3</chem>                | 80 nM   | CHEMBL3888115 | CHEMBL2083 | Training Set |      |
| 26       | CHEMBL3933786 | 415.47    | 3.6   | <chem>Cc1c(sc(NC(=O)C2=C(CCC2)C(=O)O)c1c3onc(n3)C4CC4)C5COC5</chem>     | 90 nM   | CHEMBL3888563 | CHEMBL2083 | Training Set |      |
| 27       | CHEMBL514969  | 319.4     | 4.66  | <chem>OC(=O)c1cccc2c3CCCCc3n(Cc4cccc4)c12</chem>                        | 96 nM   | CHEMBL964127  | CHEMBL2083 | Training Set |      |
| 28       | CHEMBL474944  | 362.43    | 3.76  | <chem>NC(=O)c1cccc1Cn2c3CCCCc3c4cccc(C(=O)O)c24</chem>                  | 98 nM   | CHEMBL964127  | CHEMBL2083 | Training Set |      |
| 29       | CHEMBL3944468 | 376.82    | 4.67  | <chem>OC(=O)C1(CCCC1)NC(=O)Nc2cc(Cl)c(F)cc2c3cccc3</chem>               | 100 nM  | CHEMBL3888115 | CHEMBL2083 | Training Set |      |
| 30       | CHEMBL3890150 | 429.5     | 3.99  | <chem>Cc1c(sc(NC(=O)C2=C(CCCC2)C(=O)O)c1c3onc(n3)C4CC4)C5COC5</chem>    | 105 nM  | CHEMBL3888563 | CHEMBL2083 | Training Set |      |
| 31       | CHEMBL3919746 | 389.43    | 3.03  | <chem>Cc1sc(NC(=O)C2=C(COCC2)C(=O)O)c(c1C)c3onc(n3)C4CC4</chem>         | 107 nM  | CHEMBL3888563 | CHEMBL2083 | Training Set |      |
| 32       | CHEMBL3903176 | 413.5     | 4.43  | <chem>Cc1noc(n1)c2c(NC(=O)C3=C(C4CCC3CC4)C(=O)O)sc(C)c2C5CC5</chem>     | 140 nM  | CHEMBL3888563 | CHEMBL2083 | Training Set |      |
| 33       | CHEMBL3967738 | 330.77    | 3.75  | <chem>OC(=O)C1(CC1)NC(=O)Nc2cc(Cl)ccc2c3cccc3</chem>                    | 140 nM  | CHEMBL3888115 | CHEMBL2083 | Training Set |      |
| 34       | CHEMBL3930938 | 376.82    | 4.67  | <chem>OC(=O)C1(CCCC1)NC(=O)Nc2cc(Cl)ccc2c3ccc(F)cc3</chem>              | 140 nM  | CHEMBL3888115 | CHEMBL2083 | Training Set |      |
| 35       | CHEMBL3958926 | 358.83    | 4.53  | <chem>OC(=O)C1(CCCC1)NC(=O)Nc2cc(Cl)ccc2c3cccc3</chem>                  | 150 nM  | CHEMBL3888115 | CHEMBL2083 | Training Set |      |
| 36       | CHEMBL3890665 | 439.54    | 5     | <chem>Cc1c(sc(NC(=O)C2=C(C3CCC2CC3)C(=O)O)c1c4onc(n4)C5CC5)C6CC6</chem> | 210 nM  | CHEMBL3888563 | CHEMBL2083 | Training Set |      |
| 37       | CHEMBL4113722 | 404.37    | 3.51  | <chem>Cc1sc(NC(=O)N2CCC[C@H]2C(=O)O)c(c1C)c3onc(n3)C(F)(F)F</chem>      | 217 nM  | CHEMBL3888563 | CHEMBL2083 | Training Set |      |
| 38       | CHEMBL3980900 | 348.76    | 3.88  | <chem>OC(=O)C1(CC1)NC(=O)Nc2ccc(Cl)cc2c3ccc(F)cc3</chem>                | 290 nM  | CHEMBL3888115 | CHEMBL2083 | Training Set |      |
| 39       | CHEMBL3927654 | 387.46    | 4.19  | <chem>Cc1noc(n1)c2c(NC(=O)C3=C(CCCC3)C(=O)O)sc(C)c2C4CC4</chem>         | 310 nM  | CHEMBL3888563 | CHEMBL2083 | Training Set |      |

|    |               |        |      |                                                 |         |               |            |              |
|----|---------------|--------|------|-------------------------------------------------|---------|---------------|------------|--------------|
| 40 | CHEMBL3986323 | 389.48 | 4.12 | Cc1sc(NC(=O)C2CCCCC2C(=O)O)c(c1C)c3onc(n3)C4CC4 | 345 nM  | CHEMBL3888563 | CHEMBL2083 | Training Set |
| 41 | CHEMBL474744  | 323.37 | 4.41 | OC(=O)c1cccc2c3CCCCc3n(Cc4cccc(F)c4)c12         | 400 nM  | CHEMBL964125  | CHEMBL2083 | Training Set |
| 42 | CHEMBL474743  | 323.37 | 4.41 | OC(=O)c1cccc2c3CCCCc3n(Cc4cccc4F)c12            | 400 nM  | CHEMBL964125  | CHEMBL2083 | Training Set |
| 43 | CHEMBL474944  | 362.43 | 3.76 | NC(=O)c1cccc1Cn2c3CCCCC3c4cccc(C(=O)O)c24       | 400 nM  | CHEMBL964125  | CHEMBL2083 | Training Set |
| 44 | CHEMBL474942  | 373.37 | 5.29 | OC(=O)c1cccc2c3CCCCc3n(Cc4cccc4C(F)(F)F)c12     | 400 nM  | CHEMBL964125  | CHEMBL2083 | Training Set |
| 45 | CHEMBL516469  | 271.36 | 4.02 | CCcn1c2CCCCC2c3cccc(C(=O)O)c13                  | 430 nM  | CHEMBL964125  | CHEMBL2083 | Training Set |
| 46 | CHEMBL516023  | 362.43 | 3.76 | NC(=O)c1cccc(Cn2c3CCCCC3c4cccc(C(=O)O)c24)c1    | 450 nM  | CHEMBL964125  | CHEMBL2083 | Training Set |
| 47 | CHEMBL3922017 | 392.38 | 4.89 | OC(=O)C1(CCCC1)NC(=O)Nc2cc(ccc2c3cccc3)C(F)(F)F | 520 nM  | CHEMBL3888115 | CHEMBL2083 | Training Set |
| 48 | CHEMBL514666  | 335.4  | 4.28 | COc1cccc(Cn2c3CCCCc3c4cccc(C(=O)O)c24)c1        | 550 nM  | CHEMBL964125  | CHEMBL2083 | Training Set |
| 49 | CHEMBL185595  | 253.3  | 3.66 | OC(=O)CCcn1c2cccc2c3cccc13                      | 570 nM  | CHEMBL832621  | CHEMBL2083 | Training Set |
| 50 | CHEMBL516469  | 271.36 | 4.02 | CCcn1c2CCCCC2c3cccc(C(=O)O)c13                  | 580 nM  | CHEMBL964127  | CHEMBL2083 | Training Set |
| 51 | CHEMBL514969  | 319.4  | 4.66 | OC(=O)c1cccc2c3CCCCC3n(Cc4cccc4)c12             | 590 nM  | CHEMBL964125  | CHEMBL2083 | Training Set |
| 52 | CHEMBL184136  | 316.3  | 3.5  | COc1ccc(CSc2nc(O)cc(n2)C(F)(F)F)cc1             | 600 nM  | CHEMBL833473  | CHEMBL2083 | Training Set |
| 53 | CHEMBL475549  | 335.4  | 4.28 | COc1cccc1Cn2c3CCCCc3c4cccc(C(=O)O)c24           | 600 nM  | CHEMBL964125  | CHEMBL2083 | Training Set |
| 54 | CHEMBL460750  | 387.4  | 5.68 | OC(=O)c1cccc2c3CCCCC3n(Cc4cccc4C(F)(F)F)c12     | 650 nM  | CHEMBL964125  | CHEMBL2083 | Training Set |
| 55 | CHEMBL501361  | 257.33 | 3.63 | CCcn1c2CCCCC2c3cccc(C(=O)O)c13                  | 670 nM  | CHEMBL964127  | CHEMBL2083 | Training Set |
| 56 | CHEMBL518180  | 337.39 | 4.8  | OC(=O)c1cccc2c3CCCCC3n(Cc4cccc4F)c12            | 710 nM  | CHEMBL964125  | CHEMBL2083 | Training Set |
| 57 | CHEMBL501361  | 257.33 | 3.63 | CCcn1c2CCCCC2c3cccc(C(=O)O)c13                  | 730 nM  | CHEMBL964125  | CHEMBL2083 | Training Set |
| 58 | CHEMBL459901  | 305.38 | 4.27 | OC(=O)c1ccc2c3CCCCc3n(Cc4cccc4)c2c1             | 750 nM  | CHEMBL964125  | CHEMBL2083 | Training Set |
| 59 | CHEMBL3938704 | 376.82 | 4.67 | OC(=O)C1(CCCC1)NC(=O)Nc2ccc(Cl)cc2c3ccc(F)cc3   | 750 nM  | CHEMBL3888115 | CHEMBL2083 | Training Set |
| 60 | CHEMBL184795  | 267.33 | 4.05 | OC(=O)CCCN1c2cccc2c3cccc13                      | 800 nM  | CHEMBL832621  | CHEMBL2083 | Training Set |
| 61 | CHEMBL3893057 | 344.8  | 4.14 | OC(=O)C1(CCC1)NC(=O)Nc2ccc(Cl)ccc2c3cccc3       | 810 nM  | CHEMBL3888115 | CHEMBL2083 | Training Set |
| 62 | CHEMBL3943391 | 330.77 | 3.75 | OC(=O)C1(CC1)NC(=O)Nc2ccc(Cl)cc2c3cccc3         | 890 nM  | CHEMBL3888115 | CHEMBL2083 | Training Set |
| 63 | CHEMBL82293   | 256.43 | 5.55 | CCCCCCCCCCCCCCCC(=O)O                           | 930 nM  | CHEMBL832621  | CHEMBL2083 | Training Set |
| 64 | CHEMBL3968270 | 364.32 | 4.11 | OC(=O)C1(CC1)NC(=O)Nc2cc(ccc2c3cccc3)C(F)(F)F   | 950 nM  | CHEMBL3888115 | CHEMBL2083 | Training Set |
| 65 | CHEMBL459902  | 291.35 | 3.88 | OC(=O)c1cccc2c3CCCc3n(Cc4cccc4)c12              | 970 nM  | CHEMBL964125  | CHEMBL2083 | Training Set |
| 66 | CHEMBL267476  | 280.45 | 5.88 | CCCCC\C=C/C\C=C/C/CCCCCCCC(=O)O                 | 1000 nM | CHEMBL1120075 | CHEMBL2083 | Training Set |
| 67 | CHEMBL1085570 | 294.16 | 2.75 | OC(=O)CSCC(=O)Nc1cc(Cl)cc(Cl)c1                 | 1000 nM | CHEMBL1120075 | CHEMBL2083 | Training Set |
| 68 | CHEMBL360376  | 321.32 | 2.31 | Oc1cc(nc(SCC(=O)N2CCCC2)n1)C(F)(F)F             | 1000 nM | CHEMBL833473  | CHEMBL2083 | Training Set |
| 69 | CHEMBL474943  | 387.4  | 5.68 | OC(=O)c1cccc2c3CCCCC3n(Cc4cccc(c4)C(F)(F)F)c12  | 1040 nM | CHEMBL964125  | CHEMBL2083 | Training Set |
| 70 | CHEMBL454404  | 319.4  | 4.58 | Cc1ccc(Cn2c3CCCCc3c4cccc(C(=O)O)c24)cc1         | 1090 nM | CHEMBL964125  | CHEMBL2083 | Training Set |
| 71 | CHEMBL363032  | 357.41 | 3.79 | OC(=O)c1sccc1S(=O)(=O)n2c3cccc3c4cccc24         | 1100 nM | CHEMBL832621  | CHEMBL2083 | Training Set |
| 72 | CHEMBL472747  | 282.34 | 3.24 | OC(=O)CC\C=C/C/e1nn(c2CCCc12)c3cccc3            | 1100 nM | CHEMBL964125  | CHEMBL2083 | Training Set |
| 73 | CHEMBL184605  | 321.38 | 2.95 | Cc1ccc2ccn(c2c1)S(=O)(=O)c3ccsc3C(=O)O          | 1300 nM | CHEMBL832621  | CHEMBL2083 | Training Set |
| 74 | CHEMBL427320  | 386.25 | 3.4  | OC(=O)c1sccc1S(=O)(=O)n2ccc3cc(Br)ccc23         | 1300 nM | CHEMBL832621  | CHEMBL2083 | Training Set |
| 75 | CHEMBL3914457 | 358.83 | 4.53 | OC(=O)C1(CCCC1)NC(=O)Nc2ccc(Cl)cc2c3cccc3       | 1350 nM | CHEMBL3888115 | CHEMBL2083 | Training Set |
| 76 | CHEMBL183802  | 321.38 | 2.95 | Cc1cn(c2cccc12)S(=O)(=O)c3ccsc3C(=O)O           | 1500 nM | CHEMBL832621  | CHEMBL2083 | Training Set |
| 77 | CHEMBL510638  | 373.37 | 5.29 | OC(=O)c1cccc2c3CCCCc3n(Cc4cccc(c4)C(F)(F)F)c12  | 1660 nM | CHEMBL964125  | CHEMBL2083 | Training Set |
| 78 | CHEMBL508994  | 391.36 | 5.42 | OC(=O)c1cccc2c3CCCCc3n(Cc4c(F)cccc4C(F)(F)F)c12 | 1810 nM | CHEMBL964125  | CHEMBL2083 | Training Set |
| 79 | CHEMBL452160  | 373.37 | 5.29 | OC(=O)c1cccc2c3CCCCc3n(Cc4ccc(cc4)C(F)(F)F)c12  | 2390 nM | CHEMBL964125  | CHEMBL2083 | Training Set |
| 80 | CHEMBL185553  | 337.38 | 2.65 | COc1ccc2ccn(c2c1)S(=O)(=O)c3ccsc3C(=O)O         | 2600 nM | CHEMBL832621  | CHEMBL2083 | Training Set |
| 81 | CHEMBL185362  | 337.38 | 2.65 | COc1cccc2ccn(c12)S(=O)(=O)c3ccsc3C(=O)O         | 2600 nM | CHEMBL832621  | CHEMBL2083 | Training Set |
| 82 | CHEMBL2334251 | 398.46 | 5.45 | OC(=O)CCCOc1cccc1c2cc(c3cccc3)n(n2)c4cccc4      | 3020 nM | CHEMBL2339128 | CHEMBL2083 | Training Set |
| 83 | CHEMBL1085571 | 365.84 | 3.57 | OC(=O)CSCC(=O)NCc1c(Cl)cccc1Oc2cccc2            | 3100 nM | CHEMBL1120075 | CHEMBL2083 | Training Set |

|     |               |        |      |                                                                |           |               |            |              |
|-----|---------------|--------|------|----------------------------------------------------------------|-----------|---------------|------------|--------------|
| 84  | CHEMBL3927133 | 430.49 | 3.19 | CN(C)C(=O)c1sc(NC(=O)C2=C(CCC2)C(=O)O)c(c1C)c3onc(n3)C4CC4     | 3325.9 nM | CHEMBL3888563 | CHEMBL2083 | Training Set |
| 85  | CHEMBL475548  | 334.38 | 3.9  | O\N=C/1\CCCCc2c1c3cccc(C(=O)O)c3n2Cc4cccc4                     | 3500 nM   | CHEMBL964125  | CHEMBL2083 | Training Set |
| 86  | CHEMBL365476  | 325.34 | 2.78 | OC(=O)c1sccc1S(=O)(=O)n2ccc3cc(F)ccc23                         | 3500 nM   | CHEMBL832621  | CHEMBL2083 | Training Set |
| 87  | CHEMBL515599  | 279.34 | 4    | Cc1c(C)n(Cc2cccc2)c3c(cccc13)C(=O)O                            | 3600 nM   | CHEMBL964125  | CHEMBL2083 | Training Set |
| 88  | CHEMBL182801  | 299.25 | 2.82 | COc1ccc(CNc2nc(O)cc(n2)C(F)(F)F)cc1                            | 3900 nM   | CHEMBL833473  | CHEMBL2083 | Training Set |
| 89  | CHEMBL184142  | 317.7  | 3.49 | CN(Cc1ccc(Cl)cc1)c2nc(O)cc(n2)C(F)(F)F                         | 4000 nM   | CHEMBL833473  | CHEMBL2083 | Training Set |
| 90  | CHEMBL3400905 | 248.37 | 4.76 | CC(C)c1cc(C(C)C)c(C(=O)O)c(c1)C(C)C                            | 4000 nM   | CHEMBL3404792 | CHEMBL2083 | Training Set |
| 91  | CHEMBL1085797 | 322.43 | 2.11 | OC(=O)CSCC(=O)NCc1cccc1N2CCCCC2                                | 4100 nM   | CHEMBL1120075 | CHEMBL2083 | Training Set |
| 92  | CHEMBL3931426 | 310.35 | 3.43 | CN(C(=O)Nc1cccc1c2cccc2)C3(CC3)C(=O)O                          | 4260 nM   | CHEMBL3888115 | CHEMBL2083 | Training Set |
| 93  | CHEMBL2334259 | 432.91 | 6.1  | OC(=O)CCCOc1cccc1c2cc(c3cccc3)n(n2)c4cccc4Cl                   | 4270 nM   | CHEMBL2339128 | CHEMBL2083 | Training Set |
| 94  | CHEMBL364141  | 351.38 | 3.73 | OC(=O)c1cccc1S(=O)(=O)n2c3cccc3c4cccc4                         | 4300 nM   | CHEMBL832621  | CHEMBL2083 | Training Set |
| 95  | CHEMBL2334256 | 432.91 | 6.1  | OC(=O)CCCOc1cccc1c2cc(c3cccc3)n(n2)c4ccc(Cl)cc4                | 4320 nM   | CHEMBL2339128 | CHEMBL2083 | Training Set |
| 96  | CHEMBL1086224 | 277.7  | 2.24 | OC(=O)CSCC(=O)Nc1ccc(F)c(Cl)c1                                 | 4400 nM   | CHEMBL1120075 | CHEMBL2083 | Training Set |
| 97  | CHEMBL2334249 | 412.49 | 5.76 | Cc1ccc(cc1)c2cc(nn2c3cccc3)c4cccc4OCCCC(=O)O                   | 5410 nM   | CHEMBL2339128 | CHEMBL2083 | Training Set |
| 98  | CHEMBL2334255 | 477.36 | 6.21 | OC(=O)CCCOc1cccc1c2cc(c3cccc3)n(n2)c4ccc(Br)cc4                | 5640 nM   | CHEMBL2339128 | CHEMBL2083 | Training Set |
| 99  | CHEMBL365508  | 331.35 | 2.59 | COc1ccc2ccn(c2c1)S(=O)(=O)c3cccc3C(=O)O                        | 6100 nM   | CHEMBL832621  | CHEMBL2083 | Training Set |
| 100 | CHEMBL2334246 | 432.91 | 6.1  | OC(=O)CCCOc1cccc1c2cc(c3ccc(Cl)cc3)n(n2)c4cccc4                | 6130 nM   | CHEMBL2339128 | CHEMBL2083 | Training Set |
| 101 | CHEMBL3964559 | 446.55 | 4.41 | COC(=O)c1sc(NC(=O)C2=C(C3CCC2CC3)C(=O)O)c(c1C)c4nc(C)cs4       | 6160 nM   | CHEMBL3888563 | CHEMBL2083 | Training Set |
| 102 | CHEMBL2334252 | 412.49 | 5.84 | OC(=O)CCCOc1cccc1c2cc(c3cccc3)n(n2)c4cccc4                     | 6390 nM   | CHEMBL2339128 | CHEMBL2083 | Training Set |
| 103 | CHEMBL360007  | 321.38 | 2.95 | Cc1ccc2c(ccn2S(=O)(=O)c3ccsc3C(=O)O)c1                         | 7100 nM   | CHEMBL832621  | CHEMBL2083 | Training Set |
| 104 | CHEMBL361037  | 321.38 | 2.95 | Cc1cccc2c1ccn2S(=O)(=O)c3ccsc3C(=O)O                           | 7400 nM   | CHEMBL832621  | CHEMBL2083 | Training Set |
| 105 | CHEMBL3400157 | 284.42 | 4.3  | CC(C)c1cc(C(C)C)c(c(c1)C(C)C)S(=O)(=O)O                        | 7900 nM   | CHEMBL3404792 | CHEMBL2083 | Training Set |
| 106 | CHEMBL361251  | 315.35 | 2.88 | Cc1cn(c2cccc12)S(=O)(=O)c3cccc3C(=O)O                          | 8500 nM   | CHEMBL832621  | CHEMBL2083 | Training Set |
| 107 | CHEMBL184817  | 239.27 | 3.27 | OC(=O)CCn1c2cccc2c3cccc13                                      | 9400 nM   | CHEMBL832621  | CHEMBL2083 | Training Set |
| 108 | CHEMBL2334250 | 477.36 | 6.21 | OC(=O)CCCOc1cccc1c2cc(c3ccc(Br)cc3)n(n2)c4cccc4                | 9510 nM   | CHEMBL2339128 | CHEMBL2083 | Training Set |
| 109 | CHEMBL3918729 | 399.47 | 4.36 | Cc1c(sc(NC(=O)C2=C(CCC2)C(=O)O)c1c3onc(n3)C4CC4)C5CC5          | 10 nM     | CHEMBL3888563 | CHEMBL2083 | Test Set     |
| 110 | CHEMBL3928329 | 359.41 | 3.49 | Cc1cc(c(NC(=O)C2=C(CCC2)C(=O)O)s1)c3onc(n3)C4CC4               | 20 nM     | CHEMBL3888563 | CHEMBL2083 | Test Set     |
| 111 | CHEMBL3967672 | 439.54 | 5    | Cc1sc(NC(=O)C2=C(C3CCC2CC3)C(=O)O)c(c4onc(n4)C5CC5)c1C6CC6     | 20 nM     | CHEMBL3888563 | CHEMBL2083 | Test Set     |
| 112 | CHEMBL3914622 | 427.4  | 4.51 | Cc1sc(NC(=O)C2=C(CCC2)C(=O)O)c(c3onc(n3)C4CC4)c1C(F)F          | 20 nM     | CHEMBL3888563 | CHEMBL2083 | Test Set     |
| 113 | CHEMBL3957282 | 389.5  | 4.26 | Cc1nsc(n1)c2c(C)c(sc2NC(=O)C3=C(CCC3)C(=O)O)C4CC4              | 22 nM     | CHEMBL3888563 | CHEMBL2083 | Test Set     |
| 114 | CHEMBL3913234 | 467.47 | 5.14 | Cc1sc(NC(=O)C2=C(C3CCC2CC3)C(=O)O)c(c4onc(n4)C(F)F)c1C5CC5     | 30 nM     | CHEMBL3888563 | CHEMBL2083 | Test Set     |
| 115 | CHEMBL3929717 | 403.53 | 4.65 | Cc1nsc(n1)c2c(C)c(sc2NC(=O)C3=C(CCCC3)C(=O)O)C4CC4             | 31 nM     | CHEMBL3888563 | CHEMBL2083 | Test Set     |
| 116 | CHEMBL3943278 | 403.53 | 4.33 | Cc1nsc(n1)c2c(C)c(C)sc2NC(=O)C3=C(C4CCC3CC4)C(=O)O             | 44 nM     | CHEMBL3888563 | CHEMBL2083 | Test Set     |
| 117 | CHEMBL3962973 | 486.58 | 4.07 | CN(C)c1nc(ns1)c2sc(NC(=O)C3=C(CCC3)C(=O)O)c(c2C)c4onc(n4)C5CC5 | 58.1 nM   | CHEMBL3888563 | CHEMBL2083 | Test Set     |
| 118 | CHEMBL3952008 | 403.53 | 4.65 | Cc1sc(NC(=O)C2=C(CCC2)C(=O)O)c(c1C)c3nc(ns3)C4CC4              | 85 nM     | CHEMBL3888563 | CHEMBL2083 | Test Set     |
| 119 | CHEMBL3972884 | 313.38 | 3.92 | OC(=O)C1=C(CCC1)C(=O)Nc2sccc2c3cccc3                           | 200 nM    | CHEMBL3888563 | CHEMBL2083 | Test Set     |
| 120 | CHEMBL247920  | 474.56 | 6.9  | CCc1c(c2cccc2)c(mn1c3cccc3c4cccc(OCC(=O)O)c4)c5cccc5           | 221 nM    | CHEMBL2339128 | CHEMBL2083 | Test Set     |
| 121 | CHEMBL3986323 | 389.48 | 4.12 | Cc1sc(NC(=O)C2CCCCC2C(=O)O)c(c1C)c3onc(n3)C4CC4                | 244 nM    | CHEMBL3888563 | CHEMBL2083 | Test Set     |
| 122 | CHEMBL3973942 | 427.4  | 4.28 | OC(=O)C1=C(CCC1)C(=O)Nc2sc(CC(F)(F)F)cc2c3onc(n3)C4CC4         | 247.6 nM  | CHEMBL3888563 | CHEMBL2083 | Test Set     |
| 123 | CHEMBL3899095 | 431.47 | 3.66 | CCOC(=O)c1sc(NC(=O)C2=C(CCC2)C(=O)O)c(c1C)c3onc(n3)C4CC4       | 250 nM    | CHEMBL3888563 | CHEMBL2083 | Test Set     |
| 124 | CHEMBL3958454 | 348.76 | 3.88 | OC(=O)C1(CC1)NC(=O)Nc2cc(Cl)ccc2c3ccc(F)cc3                    | 330 nM    | CHEMBL3888115 | CHEMBL2083 | Test Set     |
| 125 | CHEMBL452596  | 305.38 | 4.27 | OC(=O)c1cccc2c3CCCCc3n(Cc4cccc4)c12                            | 590 nM    | CHEMBL964125  | CHEMBL2083 | Test Set     |
| 126 | CHEMBL460749  | 337.39 | 4.8  | OC(=O)c1cccc2c3CCCCc3n(Cc4ccc(F)c4)c12                         | 720 nM    | CHEMBL964125  | CHEMBL2083 | Test Set     |
| 127 | CHEMBL518181  | 337.39 | 4.8  | OC(=O)c1cccc2c3CCCCc3n(Cc4ccc(F)cc4)c12                        | 780 nM    | CHEMBL964125  | CHEMBL2083 | Test Set     |

|     |               |        |      |                                                                   |         |               |            |          |
|-----|---------------|--------|------|-------------------------------------------------------------------|---------|---------------|------------|----------|
| 128 | CHEMBL515905  | 323.37 | 4.41 | <chem>OC(=O)c1cccc2c3CCCCc3n(Cc4ccc(F)cc4)c12</chem>              | 830 nM  | CHEMBL964125  | CHEMBL2083 | Test Set |
| 129 | CHEMBL1782963 | 446.51 | 6.34 | <chem>OC(=O)COc1ccc(c1)c2ccccc2c3cc(c4ccccc4)n(n3)c5ccccc5</chem> | 987 nM  | CHEMBL2339128 | CHEMBL2083 | Test Set |
| 130 | CHEMBL514654  | 387.4  | 5.68 | <chem>OC(=O)c1cccc2c3CCCCc3n(Cc4ccc(cc4)C(F)(F)F)c12</chem>       | 2030 nM | CHEMBL964125  | CHEMBL2083 | Test Set |
| 131 | CHEMBL2334261 | 432.91 | 6.1  | <chem>OC(=O)CCCOc1cccc1c2cc(c3ccccc3)n(n2)c4cccc(Cl)c4</chem>     | 2500 nM | CHEMBL2339128 | CHEMBL2083 | Test Set |
| 132 | CHEMBL442621  | 335.4  | 4.28 | <chem>COc1ccc(Cn2c3CCCCc3c4cccc(C(=O)O)c24)cc1</chem>             | 2680 nM | CHEMBL964125  | CHEMBL2083 | Test Set |
| 133 | CHEMBL184852  | 303.67 | 3.47 | <chem>Oc1cc(nc(NCc2ccc(Cl)cc2)n1)C(F)(F)F</chem>                  | 2900 nM | CHEMBL833473  | CHEMBL2083 | Test Set |
| 134 | CHEMBL181645  | 325.34 | 2.78 | <chem>OC(=O)c1sccc1S(=O)(=O)n2ccc3cccc(F)c23</chem>               | 4500 nM | CHEMBL832621  | CHEMBL2083 | Test Set |
| 135 | CHEMBL184846  | 325.34 | 2.78 | <chem>OC(=O)c1sccc1S(=O)(=O)n2ccc3ccc(F)cc23</chem>               | 4700 nM | CHEMBL832621  | CHEMBL2083 | Test Set |

---

## Electronic Supplementary Information

Table S2. The detailed information of the predicted compounds

| No. | DRUGBANK_ID | GENERIC_NAME       | Bayesian<br>#EstPGood | Bayesian<br>#Prediction | SMILE                                                                                          |
|-----|-------------|--------------------|-----------------------|-------------------------|------------------------------------------------------------------------------------------------|
| 1   | DB06803     | Niclosamide        | 0.997166              | TRUE                    | <chem>OC1=C(C=C(Cl)C=C1)C(=O)NC1=C(Cl)C=C(C=C1)[N+]([O-])=O</chem>                             |
| 2   | DB00824     | Enprofylline       | 0.996349              | TRUE                    | <chem>CCCN1C2=C(NC=N2)C(=O)NC1=O</chem>                                                        |
| 3   | DB12332     | Rucaparib          | 0.995734              | TRUE                    | <chem>CNCC1=CC=C(C=C1)C1=C2CCNC(=O)C3=C2C(N1)=CC(F)=C3</chem>                                  |
| 4   | DB00900     | Didanosine         | 0.995393              | TRUE                    | <chem>OC[C@@H]1CC[C@@H](O1)N1C=NC2=C1NC=NC2=O</chem>                                           |
| 5   | DB03585     | Oxyphenbutazone    | 0.992165              | TRUE                    | <chem>CCCCC1C(=O)N(N(C1=O)C1=CC=C(O)C=C1)C1=CC=CC=C1</chem>                                    |
| 6   | DB00670     | Pirenzepine        | 0.987449              | TRUE                    | <chem>CN1CCN(CC(=O)N2C3=CC=CC=C3C(=O)NC3=C2N=CC=C3)CC1</chem>                                  |
| 7   | DB01392     | Yohimbine          | 0.986557              | TRUE                    | <chem>[H][C@@]12CC[C@H](O)[C@H](C(=O)OC)[C@@]1([H])C[C@]1([H])N(CCC3=C1NC1=CC=CC=C31)C2</chem> |
| 8   | DB08826     | Deferiprone        | 0.978131              | TRUE                    | <chem>CN1C=CC(=O)C(O)=C1C</chem>                                                               |
| 9   | DB00697     | Tizanidine         | 0.974106              | TRUE                    | <chem>C1C1=C(NC2=NCCN2)C2=NSN=C2C=C1</chem>                                                    |
| 10  | DB06193     | Pixantrone         | 0.97331               | TRUE                    | <chem>NCCNC1=CC=C(NCCN)C2=C1C(=O)C1=C(C=NC=C1)C2=O</chem>                                      |
| 11  | DB04876     | Vildagliptin       | 0.971999              | TRUE                    | <chem>OC12CC3CC(C1)CC(C3)(C2)NCC(=O)N1CCC[C@H]1C#N</chem>                                      |
| 12  | DB00998     | Frovatriptan       | 0.971266              | TRUE                    | <chem>CN[C@@H]1CCC2=C(C1)C1=C(N2)C=CC(=C1)C(N)=O</chem>                                        |
| 13  | DB00993     | Azathioprine       | 0.958691              | TRUE                    | <chem>CN1C=NC(=C1SC1=NC=NC2=C1NC=N2)[N+]([O-])=O</chem>                                        |
| 14  | DB00507     | Nitazoxanide       | 0.958246              | TRUE                    | <chem>CC(=O)OC1=CC=CC=C1C(=O)NC1=NC=C(S1)[N+]([O-])=O</chem>                                   |
| 15  | DB00457     | Prazosin           | 0.954689              | TRUE                    | <chem>COC1=C(OC)C=C2C(N)=NC(=NC2=C1)N1CCN(CC1)C(=O)C1=CC=C</chem>                              |
| 16  | DB00889     | Granisetron        | 0.948685              | TRUE                    | <chem>CN1N=C(C(=O)N[C@@H]2C[C@@H]3CCC[C@H](C2)N3C)C2=C1C=CC=C2</chem>                          |
| 17  | DB09282     | Molsidomine        | 0.946336              | TRUE                    | <chem>CCOC(=O)[N-]C1=C[N+](=NO1)N1CCOCC1</chem>                                                |
| 18  | DB00213     | Pantoprazole       | 0.945318              | TRUE                    | <chem>COC1=C(OC)C(CS(=O)C2=NC3=C(N2)C=C(OC(F)F)C=C3)=NC=C1</chem>                              |
| 19  | DB00315     | Zolmitriptan       | 0.935964              | TRUE                    | <chem>CN(C)CCC1=CNC2=CC=C(C[C@H]3COC(=O)N3)C=C12</chem>                                        |
| 20  | DB11071     | Phenyl salicylate  | 0.930295              | TRUE                    | <chem>OC1=CC=CC=C1C(=O)OC1=CC=CC=C1</chem>                                                     |
| 21  | DB05239     | Cobimetinib        | 0.928284              | TRUE                    | <chem>OC1(CN(C1)C(=O)C1=C(NC2=C(F)C=C(I)C=C2)C(F)=C(F)C=C1)[C@@H]1CCCCN1</chem>                |
| 22  | DB00310     | Chlorthalidone     | 0.92612               | TRUE                    | <chem>NS(=O)(=O)C1=C(Cl)C=CC(=C1)C1(O)NC(=O)C2=CC=CC=C12</chem>                                |
| 23  | DB09343     | Tipiracil          | 0.92233               | TRUE                    | <chem>C1C1=C(CN2CCCC2=N)NC(=O)NC1=O</chem>                                                     |
| 24  | DB09151     | Flutemetamol (18F) | 0.919838              | TRUE                    | <chem>CNC1=C([18F])C=C(C=C1)C1=NC2=CC=C(O)C=C2S1</chem>                                        |
| 25  | DB04816     | Dantron            | 0.916411              | TRUE                    | <chem>OC1=CC=CC2=C1C(=O)C1=C(C=CC=C1O)C2=O</chem>                                              |
| 26  | DB04880     | Enoximone          | 0.913778              | TRUE                    | <chem>CSC1=CC=C(C=C1)C(=O)C1=C(C)NC(=O)N1</chem>                                               |
| 27  | DB00744     | Zileuton           | 0.913352              | TRUE                    | <chem>CC(N(O)C(N)=O)C1=CC2=CC=CC=C2S1</chem>                                                   |
| 28  | DB00819     | Acetazolamide      | 0.912074              | TRUE                    | <chem>CC(=O)NC1=NN=C(S1)S(N)(=O)=O</chem>                                                      |

|    |         |                        |          |      |                                                                                   |
|----|---------|------------------------|----------|------|-----------------------------------------------------------------------------------|
| 29 | DB14723 | Larotrectinib          | 0.909175 | TRUE | <chem>O[C@H]1CCN(C1)C(=O)NC1=C2N=C(C=CN2N=C1)N1CCC[C@@H]1C1=C(F)C=CC(F)=C1</chem> |
| 30 | DB00277 | Theophylline           | 0.906245 | TRUE | <chem>CN1C2=C(NC=N2)C(=O)N(C)C1=O</chem>                                          |
| 31 | DB09210 | Piracetam              | 0.899645 | TRUE | <chem>OC(=N)CN1CCCC1=O</chem>                                                     |
| 32 | DB11994 | Diacerein              | 0.895923 | TRUE | <chem>CC(=O)OC1=CC=CC2=C1C(=O)C1=C(OC(C)=O)C=C(C=C1C2=O)C(O)=O</chem>             |
| 33 | DB00791 | Uracil mustard         | 0.895759 | TRUE | <chem>C1CCN(CCC1)C1=CNC(=O)NC1=O</chem>                                           |
| 34 | DB00692 | Phentolamine           | 0.895674 | TRUE | <chem>CC1=CC=C(C=C1)N(CC1=NCCN1)C1=CC(O)=CC=C1</chem>                             |
| 35 | DB14176 | Benzylparaben          | 0.894131 | TRUE | <chem>OC1=CC=C(C=C1)C(=O)OCC1=CC=CC=C1</chem>                                     |
| 36 | DB00432 | Trifluridine           | 0.891466 | TRUE | <chem>OC[C@H]1O[C@H](C[C@@H]1O)N1C=C(C(=O)NC1=O)C(F)(F)F</chem>                   |
| 37 | DB00544 | Fluorouracil           | 0.890239 | TRUE | <chem>FC1=CNC(=O)NC1=O</chem>                                                     |
| 38 | DB00252 | Phenytoin              | 0.888466 | TRUE | <chem>O=C1NC(=O)C(N1)(C1=CC=CC=C1)C1=CC=CC=C1</chem>                              |
| 39 | DB14569 | Tedizolid              | 0.885363 | TRUE | <chem>CN1N=NC(=N1)C1=NC=C(C=C1)C1=C(F)C=C(C=C1)N1C[C@H](CO)OC1=O</chem>           |
| 40 | DB00353 | Methylergometrine      | 0.873171 | TRUE | <chem>[H][C@@]12CC3=CNC4=CC=CC(=C34)C1=C[C@H](CN2C)C(=O)N[C@@H](CC)CO</chem>      |
| 41 | DB12867 | Benperidol             | 0.855388 | TRUE | <chem>OC1=NC2=CC=CC=C2N1C1CCN(CCCC(=O)C2=CC=C(F)C=C2)CC1</chem>                   |
| 42 | DB00316 | Acetaminophen          | 0.855119 | TRUE | <chem>CC(=O)NC1=CC=C(O)C=C1</chem>                                                |
| 43 | DB01253 | Ergometrine            | 0.851646 | TRUE | <chem>[H][C@@]12CC3=CNC4=CC=CC(=C34)C1=C[C@H](CN2C)C(=O)N[C@@H](C)CO</chem>       |
| 44 | DB01205 | Flumazenil             | 0.845882 | TRUE | <chem>CCOC(=O)C1=C2CN(C)C(=O)C3=C(C=CC(F)=C3)N2C=N1</chem>                        |
| 45 | DB00323 | Tolcapone              | 0.83873  | TRUE | <chem>CC1=CC=C(C=C1)C(=O)C1=CC(=C(O)C(O)=C1)[N+](O)=O</chem>                      |
| 46 | DB00909 | Zonisamide             | 0.817339 | TRUE | <chem>NS(=O)(=O)CC1=NOC2=CC=CC=C12</chem>                                         |
| 47 | DB06807 | Phenyl aminosalicylate | 0.802597 | TRUE | <chem>NC1=CC(O)=C(C=C1)C(=O)OC1=CC=CC=C1</chem>                                   |
| 48 | DB00442 | Entecavir              | 0.795359 | TRUE | <chem>NC1=NC(=O)C2=C(N1)N(C=N2)[C@H]1C[C@H](O)[C@@H](CO)C1</chem>                 |
| 49 | DB00960 | Pindolol               | 0.794436 | TRUE | <chem>CC(C)NCC(O)COC1=CC=CC2=C1C=CN2</chem>                                       |
| 50 | DB00246 | Ziprasidone            | 0.788525 | TRUE | <chem>C1C1=C(CCN2CCN(CC2)C2=NSC3=CC=CC=C23)C=C2CC(=O)NC2=</chem>                  |
| 51 | DB00247 | Methysergide           | 0.786938 | TRUE | <chem>[H][C@@]12CC3=CN(C)C4=C3C(=CC=C4)C1=C[C@H](CN2C)C(=O)NC(CC)CO</chem>        |
| 52 | DB02959 | Oxtripitan             | 0.78627  | TRUE | <chem>N[C@@H](CC1=CNC2=C1C=C(O)C=C2)C(O)=O</chem>                                 |
| 53 | DB12015 | Alpelisib              | 0.781161 | TRUE | <chem>CC1=C(SC(NC(=O)N2CCC[C@H]2C(N)=O)=N1)C1=CC(=NC=C1)C(C)(C)C(F)(F)F</chem>    |
| 54 | DB01048 | Abacavir               | 0.777855 | TRUE | <chem>NC1=NC2=C(N=CN2[C@@H]2[C@H](CO)C=C2)C(NC2CC2)=N1</chem>                     |
| 55 | DB11793 | Niraparib              | 0.767727 | TRUE | <chem>NC(=O)C1=CC=CC2=CN(N=C12)C1=CC=C(C=C1)[C@@H]1CCCNC</chem>                   |
| 56 | DB06335 | Saxagliptin            | 0.7654   | TRUE | <chem>N[C@H](C(=O)N1[C@H]2C[C@H]2C[C@H]1C#N)C12CC3CC(CC(O)(C3)C1)C2</chem>        |
| 57 | DB04908 | Flibanserin            | 0.760944 | TRUE | <chem>FC(F)(F)C1=CC(=CC=C1)N1CCN(CCN2C(=O)NC3=CC=CC=C23)CC1</chem>                |

|    |         |                        |          |      |                                                                                |
|----|---------|------------------------|----------|------|--------------------------------------------------------------------------------|
| 58 | DB01097 | Leflunomide            | 0.748518 | TRUE | CC1=C(C=NO1)C(=O)NC1=CC=C(C=C1)C(F)(F)F                                        |
| 59 | DB00322 | Floxuridine            | 0.746043 | TRUE | OC[C@H]1O[C@H](C[C@@H]1O)N1C=C(F)C(=O)NC1=O                                    |
| 60 | DB00749 | Etodolac               | 0.715893 | TRUE | CCC1=C2NC3=C(CCOC3(CC)CC(O)=O)C2=CC=C1                                         |
| 61 | DB00649 | Stavudine              | 0.714929 | TRUE | CC1=CN([C@@H]2O[C@H](CO)C=C2)C(=O)NC1=O                                        |
| 62 | DB00601 | Linezolid              | 0.712955 | TRUE | CC(=O)NC[C@H]1CN(C(=O)O1)C1=CC(F)=C(C=C1)N1CCOCC1                              |
| 63 | DB01437 | Glutethimide           | 0.703624 | TRUE | CCC1(CCC(=O)NC1=O)C1=CC=CC=C1                                                  |
| 64 | DB05016 | Ataluren               | 0.691258 | TRUE | OC(=O)C1=CC=CC(=C1)C1=NOC(=N1)C1=CC=CC=C1F                                     |
| 65 | DB00969 | Alosetron              | 0.690017 | TRUE | CN1C2=C(C3=CC=CC=C13)C(=O)N(CC1=C(C)NC=N1)CC2                                  |
| 66 | DB13253 | Proxibarbal            | 0.68991  | TRUE | CC(O)CC1(CC=C)C(=O)NC(=O)NC1=O                                                 |
| 67 | DB00494 | Entacapone             | 0.68354  | TRUE | CCN(CC)C(=O)C=C1C=CC(=C(O)C(O)=C1)[N+](O)=O)C#N                                |
| 68 | DB00249 | Idoxuridine            | 0.672712 | TRUE | OC[C@H]1O[C@H](C[C@@H]1O)N1C=C(I)C(=O)NC1=O                                    |
| 69 | DB01020 | Isosorbide Mononitrate | 0.671196 | TRUE | [H][C@]12OC[C@@H](O[N+](O)=O)[C@@]1([H])OC[C@H]2O                              |
| 70 | DB00879 | Emtricitabine          | 0.653477 | TRUE | NC1=NC(=O)N(C=C1F)[C@H]1CS[C@H](CO)O1                                          |
| 71 | DB00225 | Gadodiamide            | 0.642425 | TRUE | O=C1O-[Gd+3]234567O=C(C[N]2(CC[N]3(CC(O)=O)CC[N]5(CC(=O)6NC)CC(=O)O7)C1)NC     |
| 72 | DB06795 | Mafenide               | 0.635063 | TRUE | NCC1=CC=C(C=C1)S(N)(=O)=O                                                      |
| 73 | DB06203 | Alogliptin             | 0.628567 | TRUE | CN1C(=O)C=C(N2CCC[C@@H](N)C2)N(CC2=C(C=CC=C2)C#N)C1=                           |
| 74 | DB02266 | Flufenamic Acid        | 0.627966 | TRUE | OC(=O)C1=CC=CC=C1NC1=CC(=CC=C1)C(F)(F)F                                        |
| 75 | DB01096 | Oxamniquine            | 0.622147 | TRUE | CC(C)NCC1CCC2=CC(CO)=C(C=C2N1)[N+](O)=O                                        |
| 76 | DB09219 | Bisoxatin              | 0.617603 | TRUE | OC1=CC=C(C=C1)C1(OC2=CC=CC=C2NC1=O)C1=CC=C(O)C=C1                              |
| 77 | DB00186 | Lorazepam              | 0.615966 | TRUE | OC1N=C(C2=CC=CC=C2Cl)C2=C(NC1=O)C=CC(Cl)=C2                                    |
| 78 | DB09421 | Protirelin             | 0.611068 | TRUE | [H][C@@](CC1=CN=CN1)(NC(=O)[C@]1([H])CCC(=O)N1)C(=O)N1C<br>CC[C@@]1([H])C(N)=O |
| 79 | DB09256 | Tegafur                | 0.57836  | TRUE | FC1=CN(C2CCCO2)C(=O)NC1=O                                                      |
| 80 | DB09327 | Tegafur-uracil         | 0.57836  | TRUE | O=C1NC=CC(=O)N1.FC1=CN(C2CCCO2)C(=O)NC1=O                                      |
| 81 | DB00580 | Valdecoxib             | 0.574496 | TRUE | CC1=C(C(=NO1)C1=CC=CC=C1)C1=CC=C(C=C1)S(N)(=O)=O                               |
| 82 | DB00655 | Estrone                | 0.560934 | TRUE | [H][C@@]12CCC(=O)[C@@]1(C)CC[C@]1([H])C3=C(CC[C@@]21[H])C=C(O)C=C3             |
| 83 | DB13211 | Guanoxan               | 0.559394 | TRUE | NC(=N)NCC1COC2=CC=CC=C2O1                                                      |
| 84 | DB00299 | Penciclovir            | 0.556805 | TRUE | NC1=NC(=O)C2=C(N1)N(CCC(CO)CO)C=N2                                             |
| 85 | DB09220 | Nicorandil             | 0.55631  | TRUE | [O-][N+](=O)OCCNC(=O)C1=CC=CN=C1                                               |
| 86 | DB14018 | Bromotheophylline      | 0.55545  | TRUE | CN1C2=C(NC(Br)=N2)C(=O)N(C)C1=O                                                |
| 87 | DB00943 | Zalcitabine            | 0.553894 | TRUE | NC1=NC(=O)N(C=C1)[C@H]1CC[C@@H](CO)O1                                          |
| 88 | DB00357 | Aminoglutethimide      | 0.550852 | TRUE | CCC1(CCC(=O)NC1=O)C1=CC=C(N)C=C1                                               |
| 89 | DB08797 | Salicylamide           | 0.542737 | TRUE | NC(=O)C1=CC=CC=C1O                                                             |
| 90 | DB00495 | Zidovudine             | 0.532211 | TRUE | CC1=CN([C@H]2C[C@H](N=[N+]=[N-                                                 |

|     |         |                       |          |      |                                                                                        |
|-----|---------|-----------------------|----------|------|----------------------------------------------------------------------------------------|
| 91  | DB13381 | Sodium ferredetate    | 0.527626 | TRUE | [Na+].[O-]C(=O)C[N+]12CC[N+]34CC(=O)O[Fe--]<br>]13(OC(=O)C2)OC(=O)C4                   |
| 92  | DB13421 | Edoxudine             | 0.523614 | TRUE | CCC1=CN([C@H]2C[C@H](O)[C@@H](CO)O2)C(=O)NC1=O                                         |
| 93  | DB00698 | Nitrofurantoin        | 0.513255 | TRUE | [O-][N+](=O)C1=CC=C(O1)\C=N\N1CC(=O)NC1=O                                              |
| 94  | DB12301 | Doravirine            | 0.513143 | TRUE | CN1C(O)=NN=C1CN1C=CC(=C(OC2=CC(=CC(CI)=C2)C#N)C1=O)C(<br>F)(F)F                        |
| 95  | DB09074 | Olaparib              | 0.502972 | TRUE | OC1=NN=C(CC2=CC(C(=O)N3CCN(CC3)C(=O)C3CC3)=C(F)C=C2)C<br>2=CC=CC=C12                   |
| 96  | DB01656 | Roflumilast           | 0.500744 | TRUE | FC(F)OC1=C(OCC2CC2)C=C(C=C1)C(=O)NC1=C(CI)C=NC=C1C1                                    |
| 97  | DB00302 | Tranexamic acid       | 0.498838 | TRUE | NC[C@H]1CC[C@@H](CC1)C(O)=O                                                            |
| 98  | DB00174 | Asparagine            | 0.49537  | TRUE | N[C@@H](CC(N)=O)C(O)=O                                                                 |
| 99  | DB00651 | Dyphylline            | 0.491929 | TRUE | CN1C2=C(N(CC(O)CO)C=N2)C(=O)N(C)C1=O                                                   |
| 100 | DB01265 | Telbivudine           | 0.487204 | TRUE | CC1=CN([C@@H]2C[C@@H](O)[C@H](CO)O2)C(=O)NC1=O                                         |
| 101 | DB11080 | Silver nitrate        | 0.484313 | TRUE | [O-][N+](=O)O[Ag]                                                                      |
| 102 | DB00551 | Acetohydroxamic acid  | 0.48136  | TRUE | CC(=O)NO                                                                               |
| 103 | DB13628 | Ethyl hydroxybenzoate | 0.480988 | TRUE | CCOC(=O)C1=CC=C(O)C=C1                                                                 |
| 104 | DB00916 | Metronidazole         | 0.480005 | TRUE | CC1=NC=C(N1CCO)[N+]([O-])=O                                                            |
| 105 | DB11629 | Laropiprant           | 0.477431 | TRUE | CS(=O)(=O)C1=C2N(CC3=CC=C(CI)C=C3)C3=C(CC[C@@H]3CC(O)<br>=O)C2=CC(F)=C1                |
| 106 | DB14084 | Butylparaben          | 0.473428 | TRUE | CCCCOC(=O)C1=CC=C(O)C=C1                                                               |
| 107 | DB00130 | L-Glutamine           | 0.471525 | TRUE | N[C@@H](CCC(N)=O)C(O)=O                                                                |
| 108 | DB00231 | Temazepam             | 0.464912 | TRUE | CN1C2=C(C=C(CI)C=C2)C(=NC(O)C1=O)C1=CC=CC=C1                                           |
| 109 | DB00619 | Imatinib              | 0.460717 | TRUE | CN1CCN(CC2=CC=C(C=C2)C(=O)NC2=CC(NC3=NC=CC(=N3)C3=C<br>N=CC=C3)=C(C)C=C2)CC1           |
| 110 | DB00484 | Brimonidine           | 0.456721 | TRUE | BrC1=C(NC2=NCCN2)C=CC2=NC=CN=C12                                                       |
| 111 | DB01005 | Hydroxyurea           | 0.451656 | TRUE | NC(=O)NO                                                                               |
| 112 | DB00499 | Flutamide             | 0.444897 | TRUE | CC(C)C(=O)NC1=CC(=C(C=C1)[N+]([O-])=O)C(F)(F)F                                         |
| 113 | DB00643 | Mebendazole           | 0.442305 | TRUE | COC(=O)NC1=NC2=C(N1)C=C(C=C2)C(=O)C1=CC=CC=C1                                          |
| 114 | DB00787 | Acyclovir             | 0.438616 | TRUE | NC1=NC(=O)C2=C(N1)N(COCCO)C=N2                                                         |
| 115 | DB00576 | Sulfamethizole        | 0.436126 | TRUE | CC1=NN=C(NS(=O)(=O)C2=CC=C(N)C=C2)S1                                                   |
| 116 | DB00201 | Caffeine              | 0.435799 | TRUE | CN1C=NC2=C1C(=O)N(C)C(=O)N2C                                                           |
| 117 | DB01015 | Sulfamethoxazole      | 0.429954 | TRUE | CC1=CC(NS(=O)(=O)C2=CC=C(N)C=C2)=NO1                                                   |
| 118 | DB12834 | Secnidazole           | 0.428307 | TRUE | CC(O)CN1C(C)=NC=C1N(=O)=O                                                              |
| 119 | DB14177 | Propylparaben         | 0.423761 | TRUE | CCCOC(=O)C1=CC=C(O)C=C1                                                                |
| 120 | DB00552 | Pentostatin           | 0.419358 | TRUE | OC[C@H]1O[C@H](C[C@@H]1O)N1C=NC2=C1N=CNC[C@H]2O                                        |
| 121 | DB11637 | Delamanid             | 0.417527 | TRUE | C[C@]1(COC2=CC=C(C=C2)N2CCC(CC2)OC2=CC=C(OC(F)(F)F)C=<br>C2)CN2C=C(N=C2O1)[N+]([O-])=O |



|     |         |                       |          |      |                                                                                                             |
|-----|---------|-----------------------|----------|------|-------------------------------------------------------------------------------------------------------------|
| 122 | DB00349 | Clobazam              | 0.410195 | TRUE | CN1C2=C(C=C(Cl)C=C2)N(C2=CC=CC=C2)C(=O)CC1=O                                                                |
| 123 | DB05219 | Crisaborole           | 0.404005 | TRUE | OB1OCC2=C1C=CC(OC1=CC=C(C=C1)C#N)=C2                                                                        |
| 124 | DB00441 | Gemcitabine           | 0.397512 | TRUE | NC1=NC(=O)N(C=C1)[C@@H]1O[C@H](CO)[C@@H](O)C1(F)F                                                           |
| 125 | DB14203 | Disperse Blue 106     | 0.392736 | TRUE | CCN(CCO)C1=CC=C(N=N\C2=NC=C(S2)N(=O)=O)C(C)=C1                                                              |
| 126 | DB09355 | Sulfabenzamide        | 0.390343 | TRUE | NC1=CC=C(C=C1)S(=O)(=O)NC(=O)C1=CC=CC=C1                                                                    |
| 127 | DB00812 | Phenylbutazone        | 0.384726 | TRUE | CCCCC1C(=O)N(N(C1=O)C1=CC=CC=C1)C1=CC=CC=C1                                                                 |
| 128 | DB00809 | Tropicamide           | 0.383871 | TRUE | CCN(CC1=CC=NC=C1)C(=O)C(CO)C1=CC=CC=C1                                                                      |
| 129 | DB00398 | Sorafenib             | 0.377385 | TRUE | CNC(=O)C1=NC=CC(OC2=CC=C(NC(=O)NC3=CC(=C(Cl)C=C3)C(F)(F)F)C=C2)=C1                                          |
| 130 | DB00348 | Nitisinone            | 0.376824 | TRUE | [O-][N+](=O)C1=C(C=CC(=C1)C(F)(F)F)C(=O)C1C(=O)CCCC1=O                                                      |
| 131 | DB00260 | Cycloserine           | 0.373351 | TRUE | N[C@@H]1CONC1=O                                                                                             |
| 132 | DB00664 | Sulfametopyrazine     | 0.372733 | TRUE | COC1=NC=CN=C1NS(=O)(=O)C1=CC=C(N)C=C1                                                                       |
| 133 | DB00820 | Tadalafil             | 0.372115 | TRUE | [H][C@]12CC3=C(NC4=CC=CC=C34)[C@H](N1C(=O)CN(C)C2=O)C1=CC2=C(OCO2)C=C1                                      |
| 134 | DB12300 | P-nitrobiphenyl       | 0.37202  | TRUE | O=N(=O)C1=CC=C(C=C1)C1=CC=CC=C1                                                                             |
| 135 | DB13248 | Phthalylsulfathiazole | 0.371702 | TRUE | OC(=O)C1=CC=CC=C1C(=O)NC1=CC=C(C=C1)S(=O)(=O)NC1=NC=CS1                                                     |
| 136 | DB01606 | Tazobactam            | 0.362611 | TRUE | [H][C@@]12CC(=O)N1[C@@H](C(O)=O)[C@](C)(CN1C=CN=N1)S2(=O)=O                                                 |
| 137 | DB12938 | Isoxaflutole          | 0.361905 | TRUE | [H]C1=NOC(=C1C(=O)C1=C(C([H])=C(C([H])=C1[H])C(F)(F)F)S(=O)(=O)C([H])([H])([H])C1([H])C([H])([H])C1([H])[H] |
| 138 | DB11157 | Anthralin             | 0.360101 | TRUE | OC1=CC=CC2=C1C(=O)C1=C(O)C=CC=C1C2                                                                          |
| 139 | DB00853 | Temozolomide          | 0.354813 | TRUE | CN1N=NC2=C(N=CN2C1=O)C(N)=O                                                                                 |
| 140 | DB00424 | Hyoscyamine           | 0.351755 | TRUE | CN1[C@H]2CC[C@@H]1C[C@@H](C2)OC(=O)[C@H](CO)C1=CC=CC=C1                                                     |
| 141 | DB00572 | Atropine              | 0.351755 | TRUE | CN1[C@H]2CC[C@@H]1C[C@@H](C2)OC(=O)C(CO)C1=CC=CC=C1                                                         |
| 142 | DB01000 | Cyclacillin           | 0.346679 | TRUE | [H][C@]12SC(C)(C)[C@@H](N1C(=O)[C@H]2NC(=O)C1(N)CCCCC1)C(O)=O                                               |
| 143 | DB00928 | Azacitidine           | 0.344651 | TRUE | NC1=NC(=O)N(C=N1)[C@@H]1O[C@H](CO)[C@@H](O)[C@H]1O                                                          |
| 144 | DB01084 | Emedastine            | 0.34091  | TRUE | CCOCCN1C(=NC2=CC=CC=C12)N1CCCN(C)CC1                                                                        |
| 145 | DB11644 | Tafamidis             | 0.338799 | TRUE | OC(=O)C1=CC2=C(C=C1)N=C(O2)C1=CC(Cl)=CC(Cl)=C1                                                              |
| 146 | DB00242 | Cladribine            | 0.332049 | TRUE | NC1=C2N=CN([C@H]3C[C@H](O)[C@@H](CO)O3)C2=NC(Cl)=N1                                                         |
| 147 | DB11978 | Glasdegib             | 0.329698 | TRUE | CN1CC[C@H](C[C@@H]1C1=NC2=CC=CC=C2N1)NC(=O)NC1=CC=C(C=C1)C#N                                                |
| 148 | DB01262 | Decitabine            | 0.326834 | TRUE | NC1=NC(=O)N(C=N1)[C@H]1C[C@H](O)[C@@H](CO)O1                                                                |
| 149 | DB04812 | Benoxaprofen          | 0.324659 | TRUE | CC(C(O)=O)C1=CC2=C(OC(=N2)C2=CC=C(Cl)C=C2)C=C1                                                              |
| 150 | DB00842 | Oxazepam              | 0.323044 | TRUE | OC1N=C(C2=CC=CC=C2)C2=C(NC1=O)C=CC(Cl)=C2                                                                   |

|     |         |                     |          |      |                                                                     |
|-----|---------|---------------------|----------|------|---------------------------------------------------------------------|
| 151 | DB01219 | Dantrolene          | 0.318712 | TRUE | [O-][N+](=O)C1=CC=C(C=C1)C1=CC=C(O1)C=NN1CC(=O)NC1=O                |
| 152 | DB04896 | Milnacipran         | 0.317151 | TRUE | CCN(CC)C(=O)C1(CC1CN)C1=CC=CC=C1                                    |
| 153 | DB08918 | Levomilnacipran     | 0.317151 | TRUE | CCN(CC)C(=O)[C@]1(C[C@H]1CN)C1=CC=CC=C1                             |
| 154 | DB00518 | Albendazole         | 0.313128 | TRUE | CCCSC1=CC2=C(C=C1)N=C(NC(=O)OC)N2                                   |
| 155 | DB13180 | Gluconic Acid       | 0.309798 | TRUE | OC[C@@H](O)[C@@H](O)[C@H](O)[C@@H](O)C(O)=O                         |
| 156 | DB13620 | Potassium gluconate | 0.309798 | TRUE | [K+].[H][C@@](O)(CO)[C@@]([H])(O)[C@]([H])(O)[C@@]([H])(O)C([O-])=O |
| 157 | DB00356 | Chlorzoxazone       | 0.304636 | TRUE | C1C1=CC2=C(OC(=O)N2)C=C1                                            |
| 158 | DB11100 | Allantoin           | 0.300526 | TRUE | NC(=O)NC1NC(=O)NC1=O                                                |
| 159 | DB01004 | Ganciclovir         | 0.293844 | TRUE | NC1=NC2=C(N=CN2COC(CO)CO)C(=O)N1                                    |
| 160 | DB00276 | Amsacrine           | 0.293215 | TRUE | COC1=C(NC2=C3C=CC=CC3=NC3=CC=CC=C23)C=CC(NS(C)(=O)O)=C1             |
| 161 | DB11285 | Ethyl ferulate      | 0.292436 | TRUE | [H]\C(=C(\[H])C1=CC(OC)=C(O)C=C1)C(=O)OCC                           |
| 162 | DB00933 | Mesoridazine        | 0.291757 | TRUE | CN1CCCCC1CCN1C2=C(SC3=C1C=C(C=C3)S(C)=O)C=CC=C2                     |
| 163 | DB01087 | Primaquine          | 0.287904 | TRUE | COC1=CC(NC(C)CCCN)=C2N=CC=CC2=C1                                    |
| 164 | DB00709 | Lamivudine          | 0.287517 | TRUE | NC1=NC(=O)N(C=C1)[C@@H]1CS[C@H](CO)O1                               |
| 165 | DB00435 | Nitric Oxide        | 0.28066  | TRUE | [N]=O                                                               |
| 166 | DB00188 | Bortezomib          | 0.266979 | TRUE | CC(C)C[C@H](NC(=O)[C@H](CC1=CC=CC=C1)NC(=O)C1=CN=CC=N1)B(O)O        |
| 167 | DB01303 | Oxtriphylline       | 0.263443 | TRUE | C[N+](C)(C)CCO.CN1C2=C([N-]C=N2)C(=O)N(C)C1=O                       |
| 168 | DB01068 | Clonazepam          | 0.261108 | TRUE | [O-][N+](=O)C1=CC2=C(NC(=O)CN=C2C2=CC=CC=C2C1)C=C1                  |
| 169 | DB00270 | Isradipine          | 0.25936  | TRUE | COC(=O)C1=C(C)NC(C)=C(C1C1=CC=CC2=NON=C12)C(=O)OC(C)C               |
| 170 | DB06605 | Apixaban            | 0.258625 | TRUE | COC1=CC=C(C=C1)N1N=C(C(N)=O)C2=C1C(=O)N(CC2)C1=CC=C(C=C1)N1CCCCC1=O |
| 171 | DB02701 | Nicotinamide        | 0.257052 | TRUE | NC(=O)C1=CC=CN=C1                                                   |
| 172 | DB11730 | Ribociclib          | 0.25026  | TRUE | CN(C)C(=O)C1=CC2=CN=C(NC3=CC=C(C=N3)N3CCNCC3)N=C2N1C1CCCC1          |
| 173 | DB00360 | Sapropterin         | 0.248805 | TRUE | [H][C@@]1(CNC2=C(N1)C(=O)NC(N)=N2)[C@@H](O)[C@H](C)O                |
| 174 | DB01558 | Bromazepam          | 0.246194 | TRUE | BrC1=CC2=C(NC(=O)CN=C2C2=CC=CC=N2)C=C1                              |
| 175 | DB11145 | Oxyquinoline        | 0.243848 | TRUE | OC1=CC=CC2=C1N=CC=C2                                                |
| 176 | DB00150 | L-Tryptophan        | 0.24049  | TRUE | N[C@@H](CC1=CNC2=CC=CC=C12)C(O)=O                                   |
| 177 | DB00383 | Oxyphencylimine     | 0.2404   | TRUE | CN1CCCN=C1COC(=O)C(O)(C1CCCCC1)C1=CC=CC=C1                          |
| 178 | DB09510 | Urea C-13           | 0.23199  | TRUE | N[13C](O)=N                                                         |
| 179 | DB11129 | Carbamide peroxide  | 0.23199  | TRUE | OO.NC(O)=N                                                          |
| 180 | DB00593 | Ethosuximide        | 0.23014  | TRUE | CCC1(C)CC(=O)NC1=O                                                  |
| 181 | DB08931 | Riociguat           | 0.227183 | TRUE | COC(=O)N(C)C1=C(N)N=C(N=C1N)C1=NN(CC2=C(F)C=CC=C2)C2=C1C=CC=N2      |

|     |         |                      |          |      |                                                                              |
|-----|---------|----------------------|----------|------|------------------------------------------------------------------------------|
| 182 | DB11901 | Apalutamide          | 0.227026 | TRUE | CNC(=O)C1=CC=C(C=C1F)N1C(=S)N(C(=O)C11CCC1)C1=CC(=C(N=C1)C#N)C(F)(F)F        |
| 183 | DB09009 | Articaine            | 0.221224 | TRUE | CCCNC(C)C(O)=NC1=C(SC=C1C)C(=O)OC                                            |
| 184 | DB02546 | Vorinostat           | 0.220316 | TRUE | ONC(=O)CCCCCCC(=O)NC1=CC=CC=C1                                               |
| 185 | DB00987 | Cytarabine           | 0.214746 | TRUE | NC1=NC(=O)N(C=C1)[C@@H]1O[C@H](CO)[C@@H](O)[C@@H]1                           |
| 186 | DB00238 | Nevirapine           | 0.211619 | TRUE | CC1=C2NC(=O)C3=C(N=CC=C3)N(C3CC3)C2=NC=C1                                    |
| 187 | DB01065 | Melatonin            | 0.210605 | TRUE | COC1=CC=C2NC=C(CCNC(C)=O)C2=C1                                               |
| 188 | DB08882 | Linagliptin          | 0.210477 | TRUE | [H][C@@]1(N)CCCN(C1)C1=NC2=C(N1CC#CC)C(=O)N(CC1=NC3=CC=CC=C3C(C)=N1)C(=O)N2C |
| 189 | DB01202 | Levetiracetam        | 0.208106 | TRUE | CC[C@H](N1CCCC1=O)C(N)=O                                                     |
| 190 | DB00740 | Riluzole             | 0.207843 | TRUE | NC1=NC2=C(S1)C=C(OC(F)(F)F)C=C2                                              |
| 191 | DB01261 | Sitagliptin          | 0.206751 | TRUE | N[C@@H](CC(=O)N1CCN2C(C1)=NN=C2C(F)(F)F)CC1=CC(F)=C(F)C=C1F                  |
| 192 | DB00575 | Clonidine            | 0.206347 | TRUE | C1C1=CC=CC(C1)=C1NC1=NCCN1                                                   |
| 193 | DB00469 | Tenoxicam            | 0.199837 | TRUE | CN1C(C(=O)NC2=CC=CC=N2)=C(O)C2=C(C=CS2)S1(=O)=O                              |
| 194 | DB01162 | Terazosin            | 0.198153 | TRUE | COC1=C(OC)C=C2C(N)=NC(=NC2=C1)N1CCN(CC1)C(=O)C1CCCCO1                        |
| 195 | DB01595 | Nitrazepam           | 0.192314 | TRUE | [O-][N+](=O)C1=CC2=C(NC(=O)CN=C2C2=CC=CC=C2)C=C1                             |
| 196 | DB00730 | Thiabendazole        | 0.182823 | TRUE | N1C2=CC=CC=C2N=C1C1=CSC=N1                                                   |
| 197 | DB04824 | Phenolphthalein      | 0.182337 | TRUE | OC1=CC=C(C=C1)C1(OC(=O)C2=CC=CC=C12)C1=CC=C(O)C=C1                           |
| 198 | DB11221 | Dioxybenzone         | 0.180699 | TRUE | COC1=CC(O)=C(C=C1)C(=O)C1=CC=CC=C1O                                          |
| 199 | DB01188 | Ciclopirox           | 0.179486 | TRUE | CC1=CC(=O)N(O)C(=C1)C1CCCCC1                                                 |
| 200 | DB00883 | Isosorbide dinitrate | 0.178845 | TRUE | [H][C@]12OC[C@H](O[N+])([O-])=O)[C@@]1([H])OC[C@H]2O[N+]([O-])=O             |
| 201 | DB00331 | Metformin            | 0.173193 | TRUE | CN(C)C(=N)NC(N)=N                                                            |
| 202 | DB06729 | Sulfaphenazole       | 0.173156 | TRUE | NC1=CC=C(C=C1)S(=O)(=O)NC1=CC=NN1C1=CC=CC=C1                                 |
| 203 | DB06268 | Sitaxentan           | 0.171189 | TRUE | CC1=NOC(NS(=O)(=O)C2=C(SC=C2)C(=O)CC2=CC3=C(OCO3)C=C2)C=C1C1                 |
| 204 | DB00920 | Ketotifen            | 0.169119 | TRUE | CN1CCC(CC1)=C1C2=C(SC=C2)C(=O)CC2=CC=CC=C12                                  |
| 205 | DB01268 | Sunitinib            | 0.167044 | TRUE | CCN(CC)CCNC(=O)C1=C(C)NC(C=C2/C(=O)NC3=C2C=C(F)C=C3)=C1C                     |
| 206 | DB00915 | Amantadine           | 0.166891 | TRUE | NC12CC3CC(CC(C3)C1)C2                                                        |
| 207 | DB00128 | Aspartic acid        | 0.163596 | TRUE | N[C@@H](CC(O)=O)C(O)=O                                                       |
| 208 | DB00808 | Indapamide           | 0.157879 | TRUE | CC1CC2=CC=CC=C2N1NC(=O)C1=CC(=C(Cl)C=C1)S(N)(=O)=O                           |
| 209 | DB00358 | Mefloquine           | 0.157699 | TRUE | OC(C1CCCCN1)C1=CC(=NC2=C1C=CC=C2C(F)(F)F)C(F)(F)F                            |
| 210 | DB00261 | Anagrelide           | 0.153479 | TRUE | C1C1=CC=C2N=C3NC(=O)CN3CC2=C1C1                                              |
| 211 | DB05381 | Histamine            | 0.151711 | TRUE | NCCC1=CNC=N1                                                                 |
| 212 | DB14212 | Methylparaben        | 0.145667 | TRUE | COC(=O)C1=CC=C(O)C=C1                                                        |

|     |         |                   |          |      |                                                                                             |
|-----|---------|-------------------|----------|------|---------------------------------------------------------------------------------------------|
| 213 | DB01428 | Oxybenzone        | 0.145642 | TRUE | <chem>COC1=CC(O)=C(C=C1)C(=O)C1=CC=CC=C1</chem>                                             |
| 214 | DB00328 | Indometacin       | 0.144258 | TRUE | <chem>COC1=CC2=C(C=C1)N(C(=O)C1=CC=C(C1)C=C1)C(C)=C2CC(O)=O</chem>                          |
| 215 | DB00589 | Lisuride          | 0.143884 | TRUE | <chem>[H][C@@]12CC3=CNC4=CC=CC(=C34)C1=C[C@@H](CN2C)NC(=O)N(CC)CC</chem>                    |
| 216 | DB00758 | Clopidogrel       | 0.143045 | TRUE | <chem>[H][C@@](N1CCC2=C(C1)C=CS2)(C(=O)OC)C1=CC=CC=C1Cl</chem>                              |
| 217 | DB00703 | Methazolamide     | 0.139892 | TRUE | <chem>CN1N=C(SC1=NC(C)=O)S(N)(=O)=O</chem>                                                  |
| 218 | DB01353 | Butobarbital      | 0.136221 | TRUE | <chem>CCCCC1(CC)C(=O)NC(=O)NC1=O</chem>                                                     |
| 219 | DB00693 | Fluorescein       | 0.135618 | TRUE | <chem>OC1=CC=C2C(OC3=CC(O)=CC=C3C22OC(=O)C3=C2C=CC=C3)=C1</chem>                            |
| 220 | DB00465 | Ketorolac         | 0.133132 | TRUE | <chem>OC(=O)C1CCN2C1=CC=C2C(=O)C1=CC=CC=C1</chem>                                           |
| 221 | DB00437 | Allopurinol       | 0.131456 | TRUE | <chem>O=C1N=CN=C2NNC=C12</chem>                                                             |
| 222 | DB00236 | Pipobroman        | 0.122589 | TRUE | <chem>BrCCC(=O)N1CCN(CC1)C(=O)CCBr</chem>                                                   |
| 223 | DB01426 | Ajmaline          | 0.120893 | TRUE | <chem>CC[C@H]1[C@@H]2C[C@H]3[C@@H]4N(C)C5=CC=CC=C5[C@]44C[C@@H](C2[C@H]4O)N3[C@@H]1O</chem> |
| 224 | DB11989 | Benznidazole      | 0.120474 | TRUE | <chem>OC(CN1C=CN=C1N(=O)=O)=NCC1=CC=CC=C1</chem>                                            |
| 225 | DB08905 | Formestane        | 0.120293 | TRUE | <chem>[H][C@@]12CCC(=O)[C@@]1(C)CC[C@@]1([H])[C@@]2([H])CCC2=C(O)C(=O)CC[C@]12C</chem>      |
| 226 | DB00747 | Scopolamine       | 0.119647 | TRUE | <chem>CN1[C@H]2C[C@@H](C[C@@H]1[C@H]1O[C@@H]21)OC(=O)[C@H](CO)C1=CC=CC=C1</chem>            |
| 227 | DB00226 | Guanadrel         | 0.11889  | TRUE | <chem>NC(N)=NCC1COC2(CCCCC2)O1</chem>                                                       |
| 228 | DB00338 | Omeprazole        | 0.117756 | TRUE | <chem>COC1=CC2=C(C=C1)N=C(N2)S(=O)CC1=NC=C(C)C(OC)=C1C</chem>                               |
| 229 | DB00736 | Esomeprazole      | 0.117756 | TRUE | <chem>COC1=CC2=C(NC(=N2)[S@@](=O)CC2=NC=C(C)C(OC)=C2C)C=C1</chem>                           |
| 230 | DB11967 | Binimetinib       | 0.117167 | TRUE | <chem>CN1C=NC2=C(F)C(NC3=CC=C(Br)C=C3F)=C(C=C12)C(=O)NOCCO</chem>                           |
| 231 | DB00194 | Vidarabine        | 0.11686  | TRUE | <chem>NC1=NC=NC2=C1N=CN2[C@@H]1O[C@H](CO)[C@@H](O)[C@@H]1O</chem>                           |
| 232 | DB00640 | Adenosine         | 0.11686  | TRUE | <chem>NC1=C2N=CN([C@@H]3O[C@H](CO)[C@@H](O)[C@H]3O)C2=NC=N1</chem>                          |
| 233 | DB13221 | Apronalide        | 0.116311 | TRUE | <chem>CC(C)C(CC=C)C(=O)NC(N)=O</chem>                                                       |
| 234 | DB11738 | Rilmenidine       | 0.115686 | TRUE | <chem>C1CC1C(NC1=NCCO1)C1CC1</chem>                                                         |
| 235 | DB00359 | Sulfadiazine      | 0.115208 | TRUE | <chem>NC1=CC=C(C=C1)S(=O)(=O)NC1=NC=CC=N1</chem>                                            |
| 236 | DB00600 | Monobenzone       | 0.114168 | TRUE | <chem>OC1=CC=C(OCC2=CC=CC=C2)C=C1</chem>                                                    |
| 237 | DB08875 | Cabozantinib      | 0.114167 | TRUE | <chem>COC1=CC2=C(C=C1OC)C(OC1=CC=C(NC(=O)C3(CC3)C(=O)NC3=C(C(F)C=C3)C=C1)=CC=N2</chem>      |
| 238 | DB04743 | Nimesulide        | 0.113606 | TRUE | <chem>CS(=O)(=O)NC1=C(OC2=CC=CC=C2)C=C(C=C1)[N+](O-)=O</chem>                               |
| 239 | DB00263 | Sulfisoxazole     | 0.112683 | TRUE | <chem>CC1=NOC(NS(=O)(=O)C2=CC=C(N)C=C2)=C1C</chem>                                          |
| 240 | DB09543 | Methyl salicylate | 0.111671 | TRUE | <chem>COC(=O)C1=CC=CC=C1O</chem>                                                            |
| 241 | DB00754 | Ethotoin          | 0.11138  | TRUE | <chem>CCN1C(=O)NC(C1=O)C1=CC=CC=C1</chem>                                                   |
| 242 | DB02925 | Piretanide        | 0.110852 | TRUE | <chem>NS(=O)(=O)C1=CC(=CC(N2CCCC2)=C1OC1=CC=CC=C1)C(O)=O</chem>                             |

|     |         |                                      |           |      |                                                                                                           |
|-----|---------|--------------------------------------|-----------|------|-----------------------------------------------------------------------------------------------------------|
| 243 | DB08883 | Perampanel                           | 0.110195  | TRUE | <chem>O=C1N(C=C(C=C1C1=CC=CC=C1C#N)C1=NC=CC=C1)C1=CC=CC=</chem>                                           |
| 244 | DB13278 | Bucetin                              | 0.109591  | TRUE | <chem>CCOC1=CC=C(NC(=O)CC(C)O)C=C1</chem>                                                                 |
| 245 | DB00794 | Primidone                            | 0.104656  | TRUE | <chem>CCC1(C(=O)NCNC1=O)C1=CC=CC=C1</chem>                                                                |
| 246 | DB01331 | Cefoxitin                            | 0.104526  | TRUE | <chem>[H][C@]12SCC(COC(N)=O)=C(N1C(=O)[C@]2(NC(=O)CC1=CC=CS1)OC)C(O)=O</chem>                             |
| 247 | DB09034 | Suvorexant                           | 0.103634  | TRUE | <chem>[H][C@@]1(C)CCN(CCN1C(=O)C1=C(C=CC(C)=C1)N1N=CC=N1)C1=NC2=C(O1)C=CC(Cl)=C2</chem>                   |
| 248 | DB00625 | Efavirenz                            | 0.101847  | TRUE | <chem>FC(F)(F)[C@]1(OC(=O)NC2=C1C=C(Cl)C=C2)C#CC1CC1</chem>                                               |
| 249 | DB06201 | Rufinamide                           | 0.0995199 | TRUE | <chem>NC(=O)C1=CN(CC2=C(F)C=CC=C2F)N=N1</chem>                                                            |
| 250 | DB13235 | Perboric acid                        | 0.0977367 | TRUE | <chem>OOB=O</chem>                                                                                        |
| 251 | DB00145 | Glycine                              | 0.0963813 | TRUE | <chem>NCC(O)=O</chem>                                                                                     |
| 252 | DB11189 | Magnesium glycinate                  | 0.0963813 | TRUE | <chem>[Mg++].NCC([O-])=O.NCC([O-])=O</chem>                                                               |
| 253 | DB11200 | Aluminum zirconium octachlorohydrate | 0.0963813 | TRUE | <chem>O.O.[Al+3].[Cl-].[Zr+4].NCC([O-])=O</chem>                                                          |
| 254 | DB11210 | Ferrous bisglycinate                 | 0.0963813 | TRUE | <chem>[Fe++].NCC([O-])=O.NCC([O-])=O</chem>                                                               |
| 255 | DB11699 | Tropisetron                          | 0.0935824 | TRUE | <chem>[H][C@]12CC[C@]([H])(C[C@@]([H])(C1)OC(=O)C1=CNC3=CC=CC=C3)N2C</chem>                               |
| 256 | DB00339 | Pyrazinamide                         | 0.0934215 | TRUE | <chem>NC(=O)C1=NC=CN=C1</chem>                                                                            |
| 257 | DB00211 | Midodrine                            | 0.0930224 | TRUE | <chem>COC1=CC(C(O)CNC(=O)CN)=C(OC)C=C1</chem>                                                             |
| 258 | DB09060 | Avibactam                            | 0.0925319 | TRUE | <chem>[H]OS(=O)(=O)ON1C(=O)N2C([H])([H])[C@@]1([H])C([H])([H])C([H])([H])[C@@]2([H])C(=O)N([H])[H]</chem> |
| 259 | DB01544 | Flunitrazepam                        | 0.0914111 | TRUE | <chem>CN1C2=C(C=C(C=C2)[N+])([O-])C(=NCC1=O)C1=CC=CC=C1F</chem>                                           |
| 260 | DB00271 | Diatrizoate                          | 0.0913417 | TRUE | <chem>CC(=O)NC1=C(I)C(C(O)=O)=C(I)C(NC(C)=O)=C1I</chem>                                                   |
| 261 | DB00811 | Ribavirin                            | 0.0895423 | TRUE | <chem>NC(=O)C1=NN(C=N1)[C@@H]1O[C@H](CO)[C@@H](O)[C@H]1O</chem>                                           |
| 262 | DB01609 | Deferasirox                          | 0.0889495 | TRUE | <chem>OC(=O)C1=CC=C(C=C1)N1N=C(N=C1C1=CC=CC=C1O)C1=CC=CC=C1O</chem>                                       |
| 263 | DB01063 | Acetophenazine                       | 0.0888546 | TRUE | <chem>CC(=O)C1=CC=C2SC3=C(C=CC=C3)N(CCCN3CCN(CCO)CC3)C2=C</chem>                                          |
| 264 | DB05245 | Silver sulfadiazine                  | 0.0886943 | TRUE | <chem>[Ag+].NC1=CC=C(C=C1)S(=O)(=O)[N-]C1=NC=CC=N1</chem>                                                 |
| 265 | DB00305 | Mitomycin                            | 0.0874806 | TRUE | <chem>CO[C@]12[C@H]3N[C@H]3CN1C1=C([C@H]2COC(N)=O)C(=O)C(N)=C(C)C1=O</chem>                               |
| 266 | DB00951 | Isoniazid                            | 0.0872446 | TRUE | <chem>NNC(=O)C1=CC=NC=C1</chem>                                                                           |
| 267 | DB00402 | Eszopiclone                          | 0.0868553 | TRUE | <chem>CN1CCN(CC1)C(=O)O[C@@H]1N(C(=O)C2=NC=CN=C12)C1=NC=C(Cl)C=C1</chem>                                  |
| 268 | DB01198 | Zopiclone                            | 0.0868553 | TRUE | <chem>CN1CCN(CC1)C(=O)OC1N(C(=O)C2=NC=CN=C12)C1=NC=C(Cl)C=C</chem>                                        |
| 269 | DB05541 | Brivaracetam                         | 0.0856979 | TRUE | <chem>CCC[C@H]1CN([C@@H](CC)C(N)=O)C(=O)C1</chem>                                                         |
| 270 | DB01041 | Thalidomide                          | 0.0845614 | TRUE | <chem>O=C1N(C2CCC(=O)NC2=O)C(=O)C2=CC=CC=C12</chem>                                                       |
| 271 | DB00155 | L-Citrulline                         | 0.0833195 | TRUE | <chem>N[C@@H](CCCNC(N)=O)C(O)=O</chem>                                                                    |

|     |         |                            |           |      |                                                                                                                                                                                   |
|-----|---------|----------------------------|-----------|------|-----------------------------------------------------------------------------------------------------------------------------------------------------------------------------------|
| 272 | DB14763 | Cycloguanil                | 0.0833136 | TRUE | <chem>CC1(C)N=C(N)N=C(N)N1C1=CC=C(Cl)C=C1</chem>                                                                                                                                  |
| 273 | DB00680 | Moricizine                 | 0.0830163 | TRUE | <chem>CCOC(=O)NC1=CC2=C(SC3=CC=CC=C3N2C(=O)CCN2CCOCC2)C=</chem>                                                                                                                   |
| 274 | DB01250 | Olsalazine                 | 0.0829222 | TRUE | <chem>OC(=O)C1=CC(=CC=C1O)\N=N\C1=CC=C(O)C(=C1)C(O)=O</chem>                                                                                                                      |
| 275 | DB11346 | Rubidium                   | 0.0815577 | TRUE | [Rb]                                                                                                                                                                              |
| 276 | DB04571 | Trioxsalen                 | 0.0810232 | TRUE | <chem>CC1=CC2=CC3=C(OC(=O)C=C3C)C(C)=C2O1</chem>                                                                                                                                  |
| 277 | DB00123 | L-Lysine                   | 0.0804925 | TRUE | <chem>NCCCC[C@H](N)C(O)=O</chem>                                                                                                                                                  |
| 278 | DB13146 | Fluciclovine (18F)         | 0.0795394 | TRUE | <chem>N[C@]1(C[C@H]([18F])C1)C(O)=O</chem>                                                                                                                                        |
| 279 | DB06766 | Alcaftadine                | 0.0783772 | TRUE | <chem>CN1CCC(CC1)=C1C2=NC=C(C=O)N2CCC2=CC=CC=C12</chem>                                                                                                                           |
| 280 | DB04272 | Citric acid                | 0.0781864 | TRUE | <chem>OC(=O)CC(O)(CC(O)=O)C(O)=O</chem>                                                                                                                                           |
| 281 | DB06784 | Gallium citrate Ga 67      | 0.0781864 | TRUE | <chem>[67Ga+3].OC(CC([O-])=O)(CC([O-])=O)C([O-])=O</chem>                                                                                                                         |
| 282 | DB09125 | Potassium Citrate          | 0.0781864 | TRUE | <chem>[K+].[K+].[K+].OC(CC([O-])=O)(CC([O-])=O)C([O-])=O</chem>                                                                                                                   |
| 283 | DB09154 | Sodium citrate             | 0.0781864 | TRUE | <chem>[Na+].[Na+].[Na+].OC(CC([O-])=O)(CC([O-])=O)C([O-])=O</chem>                                                                                                                |
| 284 | DB14507 | Lithium citrate            | 0.0781864 | TRUE | <chem>[Li+].[Li+].[Li+].OC(CC([O-])=O)(CC([O-])=O)C([O-])=O</chem>                                                                                                                |
| 285 | DB06713 | Norelgestromin             | 0.0781516 | TRUE | <chem>[H][C@@]12CC[C@@](O)(C#C)[C@@]1(CC)CC[C@]1([H])[C@@]3([H])CCC(C=C3CC[C@@]21[H])=NO</chem>                                                                                   |
| 286 | DB00347 | Trimethadione              | 0.078127  | TRUE | <chem>CN1C(=O)OC(C)(C)C1=O</chem>                                                                                                                                                 |
| 287 | DB11115 | Ensulizole                 | 0.0771652 | TRUE | <chem>OS(=O)(=O)C1=CC2=C(C=C1)N=C(N2)C1=CC=CC=C1</chem>                                                                                                                           |
| 288 | DB01333 | Cefradine                  | 0.0769813 | TRUE | <chem>[H][C@]12SCC(C)=C(N1C(=O)[C@H]2NC(=O)[C@H](N)C1=CCC=C</chem><br><chem>C1)C(O)=O</chem>                                                                                      |
| 289 | DB06711 | Naphazoline                | 0.0769542 | TRUE | <chem>C(C1=NCCN1)C1=CC=CC2=CC=CC=C12</chem>                                                                                                                                       |
| 290 | DB11268 | Protocatechualdehyde       | 0.0758732 | TRUE | <chem>OC1=CC=C(C=O)C=C1O</chem>                                                                                                                                                   |
| 291 | DB01112 | Cefuroxime                 | 0.0754888 | TRUE | <chem>[H][C@]12SCC(COC(N)=O)=C(N1C(=O)[C@H]2NC(=O)C(=N/OC)C1</chem><br><chem>=CC=CO1)C(O)=O</chem>                                                                                |
| 292 | DB00217 | Bethanidine                | 0.074771  | TRUE | <chem>CN\C(NCC1=CC=CC=C1)=N/C</chem>                                                                                                                                              |
| 293 | DB00480 | Lenalidomide               | 0.0746258 | TRUE | <chem>NC1=CC=CC2=C1CN(C1CCC(=O)NC1=O)C2=O</chem>                                                                                                                                  |
| 294 | DB08896 | Regorafenib                | 0.0732597 | TRUE | <chem>CNC(=O)C1=CC(OC2=CC(F)=C(NC(=O)NC3=CC=C(Cl)C(=C3)C(F)(F</chem><br><chem>)F)C=C2)=CC=N1</chem>                                                                               |
| 295 | DB00165 | Pyridoxine                 | 0.0731211 | TRUE | <chem>CC1=C(O)C(CO)=C(CO)C=N1</chem>                                                                                                                                              |
| 296 | DB13222 | Tilbroquinol               | 0.0730644 | TRUE | <chem>CC1=C2C=CC=NC2=C(O)C(Br)=C1</chem>                                                                                                                                          |
| 297 | DB00784 | Mefenamic acid             | 0.0728386 | TRUE | <chem>CC1=C(C)C(NC2=CC=CC=C2C(O)=O)=CC=C1</chem>                                                                                                                                  |
| 298 | DB11274 | Dihydro-alpha-ergocryptine | 0.0725382 | TRUE | <chem>[H][C@@]12CCCN1C(=O)[C@H](CC(C)C)N1C(=O)[C@](NC(=O)[C</chem><br><chem>@H]3CN(C)[C@]4([H])CC5=CNC6=CC=CC(=C56)[C@@]4([H])C3)(O</chem><br><chem>[C@@]121O)C(C)C</chem>        |
| 299 | DB11275 | Epicriptine                | 0.0725382 | TRUE | <chem>[H][C@@]12CCCN1C(=O)[C@]([H])([C@H](C)CC)N1C(=O)[C@](NC</chem><br><chem>(=O)[C@H]3CN(C)[C@]4([H])CC5=CNC6=CC=CC(=C56)[C@@]4([H</chem><br><chem>]C3)(O[C@@]121O)C(C)C</chem> |
| 300 | DB01129 | Rabeprazole                | 0.0718749 | TRUE | <chem>COCCOC1=C(C)C(CS(=O)C2=NC3=CC=CC=C3N2)=NC=C1</chem>                                                                                                                         |

|     |         |                   |           |      |                                                                                         |
|-----|---------|-------------------|-----------|------|-----------------------------------------------------------------------------------------|
| 301 | DB00508 | Triflupromazine   | 0.0718005 | TRUE | CN(C)CCCN1C2=CC=CC=C2SC2=C1C=C(C=C2)C(F)(F)F                                            |
| 302 | DB00891 | Sulfapyridine     | 0.0711981 | TRUE | NC1=CC=C(C=C1)S(=O)(=O)NC1=CC=CC=N1                                                     |
| 303 | DB09348 | Propiolactone     | 0.0708797 | TRUE | O=C1CCO1                                                                                |
| 304 | DB00536 | Guanidine         | 0.0706807 | TRUE | NC(N)=N                                                                                 |
| 305 | DB14189 | Ethylenediamine   | 0.0697482 | TRUE | NCCN                                                                                    |
| 306 | DB01243 | Chloroxine        | 0.0696971 | TRUE | OC1=C(Cl)C=C(Cl)C2=C1N=CC=C2                                                            |
| 307 | DB04864 | Huperzine A       | 0.0695212 | TRUE | [H][C@@]12CC3=C(C=CC(=O)N3)[C@@](N)(CC(C)=C1)\C2=C\C                                    |
| 308 | DB00571 | Propranolol       | 0.0688609 | TRUE | CC(C)NCC(O)COC1=CC=CC2=C1C=CC=C2                                                        |
| 309 | DB01419 | Antrafenine       | 0.0687457 | TRUE | FC(F)(F)C1=CC(=CC=C1)N1CCN(CCOC(=O)C2=CC=CC=C2NC2=C3                                    |
| 310 | DB00209 | Trospium          | 0.0686243 | TRUE | C=CC(=CC3=NC=C2)C(F)(F)F)CC1<br>[H][C@]12CC[C@]([H])(C[C@@H](C1)OC(=O)C(O)(C1=CC=CC=C1) |
| 311 | DB00996 | Gabapentin        | 0.0676154 | TRUE | C1=CC=CC=C1)[N+]21CCCC1                                                                 |
| 312 | DB11323 | Glycol salicylate | 0.0674483 | TRUE | NCC1(CC(O)=O)CCCC1                                                                      |
| 313 | DB12328 | Cantharidin       | 0.0655448 | TRUE | OCCOC(=O)C1=CC=CC=C1O                                                                   |
| 314 | DB00911 | Tinidazole        | 0.0653416 | TRUE | [H][C@]12CC[C@]([H])(O1)[C@]1(C)C(=O)OC(=O)[C@]21C                                      |
| 315 | DB06147 | Sulfathiazole     | 0.062849  | TRUE | CCS(=O)(=O)CCN1C(C)=NC=C1[N+](=[O-])=O                                                  |
| 316 | DB00423 | Methocarbamol     | 0.0626494 | TRUE | NC1=CC=C(C=C1)S(=O)(=O)NC1=NC=CS1                                                       |
| 317 | DB00156 | L-Threonine       | 0.0623263 | TRUE | COC1=C(OCC(O)COC(N)=O)C=CC=C1                                                           |
|     |         |                   |           |      | C[C@@H](O)[C@H](N)C(O)=O                                                                |

## Electronic Supplementary Information

Table S3. The docking score of the 30 compounds

| No. | DRUGBANK_ID | GENERIC_NAME   | S          | No. | DRUGBANK_ID | GENERIC_NAME      | S          |
|-----|-------------|----------------|------------|-----|-------------|-------------------|------------|
| 1   | DB05239     | Cobimetinib    | -6.9310613 | 70  | DB00900     | Didanosine        | -5.0609403 |
| 2   | DB14723     | Larotrectinib  | -6.8676357 | 71  | DB04876     | Vildagliptin      | -5.0533996 |
| 3   | DB00213     | Pantoprazole   | -6.7913752 | 72  | DB00744     | Zileuton          | -5.0380626 |
| 4   | DB00213     | Pantoprazole   | -6.7520752 | 73  | DB00998     | Frovatriptan      | -5.0302234 |
| 5   | DB00213     | Pantoprazole   | -6.6503758 | 74  | DB04880     | Enoximone         | -5.0110369 |
| 6   | DB04876     | Vildagliptin   | -6.4164033 | 75  | DB09282     | Molsidomine       | -5.0015845 |
| 7   | DB00213     | Pantoprazole   | -6.4119277 | 76  | DB04880     | Enoximone         | -4.9902353 |
| 8   | DB00213     | Pantoprazole   | -6.3987718 | 77  | DB03585     | Oxyphenbutazone   | -4.9828973 |
| 9   | DB00213     | Pantoprazole   | -6.3169456 | 78  | DB00819     | Acetazolamide     | -4.9660068 |
| 10  | DB00213     | Pantoprazole   | -6.2566361 | 79  | DB04880     | Enoximone         | -4.9610066 |
| 11  | DB00213     | Pantoprazole   | -6.2308168 | 80  | DB00819     | Acetazolamide     | -4.9598055 |
| 12  | DB04876     | Vildagliptin   | -6.1883755 | 81  | DB00819     | Acetazolamide     | -4.9260912 |
| 13  | DB05239     | Cobimetinib    | -6.1456776 | 82  | DB00998     | Frovatriptan      | -4.9125171 |
| 14  | DB00213     | Pantoprazole   | -6.1377616 | 83  | DB00819     | Acetazolamide     | -4.9092851 |
| 15  | DB00213     | Pantoprazole   | -6.0704384 | 84  | DB04880     | Enoximone         | -4.8812084 |
| 16  | DB00310     | Chlorthalidone | -5.9882131 | 85  | DB00310     | Chlorthalidone    | -4.8554726 |
| 17  | DB09282     | Molsidomine    | -5.9811907 | 86  | DB00900     | Didanosine        | -4.8495426 |
| 18  | DB00507     | Nitazoxanide   | -5.9355636 | 87  | DB00819     | Acetazolamide     | -4.8384676 |
| 19  | DB00310     | Chlorthalidone | -5.9206076 | 88  | DB04880     | Enoximone         | -4.8022776 |
| 20  | DB00315     | Zolmitriptan   | -5.9201198 | 89  | DB00819     | Acetazolamide     | -4.7723927 |
| 21  | DB04876     | Vildagliptin   | -5.9064178 | 90  | DB00744     | Zileuton          | -4.7609982 |
| 22  | DB00310     | Chlorthalidone | -5.8500347 | 91  | DB00900     | Didanosine        | -4.7413168 |
| 23  | DB09282     | Molsidomine    | -5.8116651 | 92  | DB09343     | Tipiracil         | -4.7008104 |
| 24  | DB00507     | Nitazoxanide   | -5.80197   | 93  | DB04880     | Enoximone         | -4.6996794 |
| 25  | DB09282     | Molsidomine    | -5.7635555 | 94  | DB00900     | Didanosine        | -4.6848683 |
| 26  | DB00670     | Pirenzepine    | -5.7619653 | 95  | DB00744     | Zileuton          | -4.6568017 |
| 27  | DB00507     | Nitazoxanide   | -5.7578802 | 96  | DB00744     | Zileuton          | -4.6483922 |
| 28  | DB04876     | Vildagliptin   | -5.7227197 | 97  | DB04876     | Vildagliptin      | -4.62394   |
| 29  | DB00507     | Nitazoxanide   | -5.7087951 | 98  | DB00900     | Didanosine        | -4.6178613 |
| 30  | DB00315     | Zolmitriptan   | -5.7006006 | 99  | DB11071     | Phenyl salicylate | -4.60466   |
| 31  | DB09282     | Molsidomine    | -5.6945457 | 100 | DB00819     | Acetazolamide     | -4.6022539 |
| 32  | DB04876     | Vildagliptin   | -5.6750097 | 101 | DB00819     | Acetazolamide     | -4.5971136 |
| 33  | DB00310     | Chlorthalidone | -5.6692777 | 102 | DB00744     | Zileuton          | -4.5873461 |
| 34  | DB09282     | Molsidomine    | -5.649694  | 103 | DB00900     | Didanosine        | -4.5755157 |
| 35  | DB00507     | Nitazoxanide   | -5.6490493 | 104 | DB09343     | Tipiracil         | -4.5649681 |
| 36  | DB00315     | Zolmitriptan   | -5.6438961 | 105 | DB00744     | Zileuton          | -4.5559154 |
| 37  | DB00315     | Zolmitriptan   | -5.6402564 | 106 | DB00900     | Didanosine        | -4.5550489 |
| 38  | DB00315     | Zolmitriptan   | -5.57125   | 107 | DB00900     | Didanosine        | -4.5194349 |
| 39  | DB00315     | Zolmitriptan   | -5.5673938 | 108 | DB09343     | Tipiracil         | -4.5189333 |
| 40  | DB00507     | Nitazoxanide   | -5.5527329 | 109 | DB00744     | Zileuton          | -4.4812813 |
| 41  | DB06803     | Niclosamide    | -5.5374866 | 110 | DB09343     | Tipiracil         | -4.4812746 |
| 42  | DB09282     | Molsidomine    | -5.4974127 | 111 | DB00900     | Didanosine        | -4.4752998 |
| 43  | DB00315     | Zolmitriptan   | -5.4557352 | 112 | DB00824     | Enprofylline      | -4.4344225 |
| 44  | DB00310     | Chlorthalidone | -5.454011  | 113 | DB00744     | Zileuton          | -4.3904948 |
| 45  | DB00998     | Frovatriptan   | -5.4325595 | 114 | DB00744     | Zileuton          | -4.3821363 |
| 46  | DB09282     | Molsidomine    | -5.4288454 | 115 | DB00744     | Zileuton          | -4.3412452 |
| 47  | DB00310     | Chlorthalidone | -5.4204068 | 116 | DB00824     | Enprofylline      | -4.3327179 |
| 48  | DB00507     | Nitazoxanide   | -5.4191132 | 117 | DB11071     | Phenyl salicylate | -4.3224015 |
| 49  | DB09282     | Molsidomine    | -5.4189315 | 118 | DB04876     | Vildagliptin      | -4.3051376 |
| 50  | DB00310     | Chlorthalidone | -5.4050231 | 119 | DB00824     | Enprofylline      | -4.3013377 |
| 51  | DB09282     | Molsidomine    | -5.3831968 | 120 | DB00824     | Enprofylline      | -4.281477  |
| 52  | DB06803     | Niclosamide    | -5.3375182 | 121 | DB00819     | Acetazolamide     | -4.2222891 |
| 53  | DB04876     | Vildagliptin   | -5.3273134 | 122 | DB00819     | Acetazolamide     | -4.1852341 |
| 54  | DB00315     | Zolmitriptan   | -5.3225026 | 123 | DB00824     | Enprofylline      | -4.1829643 |
| 55  | DB00998     | Frovatriptan   | -5.3047891 | 124 | DB00824     | Enprofylline      | -4.1712618 |
| 56  | DB00315     | Zolmitriptan   | -5.2804046 | 125 | DB00824     | Enprofylline      | -4.1663761 |
| 57  | DB00998     | Frovatriptan   | -5.259182  | 126 | DB01392     | Yohimbine         | -4.0634894 |
| 58  | DB14723     | Larotrectinib  | -5.2465992 | 127 | DB00824     | Enprofylline      | -4.0518947 |
| 59  | DB00998     | Frovatriptan   | -5.2332926 | 128 | DB09343     | Tipiracil         | -4.0467296 |



|    |         |                |            |     |         |                 |            |
|----|---------|----------------|------------|-----|---------|-----------------|------------|
| 60 | DB04880 | Enoximone      | -5.2275014 | 129 | DB00824 | Enprofylline    | -4.0120158 |
| 61 | DB00900 | Didanosine     | -5.2228055 | 130 | DB01392 | Yohimbine       | -3.9413302 |
| 62 | DB00315 | Zolmitriptan   | -5.2075071 | 131 | DB00824 | Enprofylline    | -3.8031516 |
| 63 | DB00310 | Chlorthalidone | -5.1740584 | 132 | DB01392 | Yohimbine       | -3.3361256 |
| 64 | DB04880 | Enoximone      | -5.1681366 | 133 | DB00670 | Pirenzepine     | 25.356607  |
| 65 | DB00670 | Pirenzepine    | -5.1599541 | 134 | DB03585 | Oxyphenbutazone | 26.837795  |
| 66 | DB04880 | Enoximone      | -5.130342  | 135 | DB12332 | Rucaparib       | 37.265541  |
| 67 | DB00507 | Nitazoxanide   | -5.1014695 | 136 | DB00457 | Prazosin        | 82.314819  |
| 68 | DB00310 | Chlorthalidone | -5.0798001 | 137 | DB14723 | Larotrectinib   | 123.47587  |
| 69 | DB04880 | Enoximone      | -5.0775814 | 138 | DB00670 | Pirenzepine     | 125.87755  |

---

Electronic Supplementary Information

Figure 3A-The uncropped and unprocessed image of the full blot

Figure 3A  
RAW264.7  
p-JNK

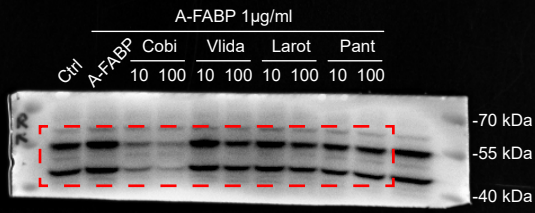

Figure 3A  
RAW264.7  
JNK

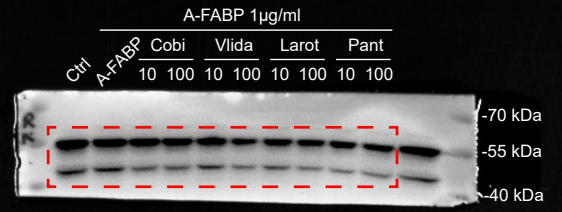

Figure 3A  
RAW264.7  
p-c-Jun

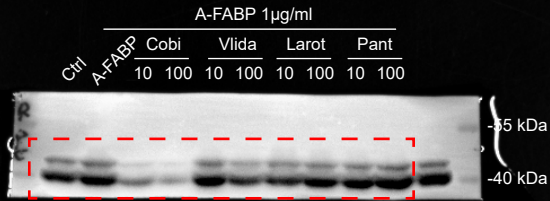

Figure 3A  
RAW264.7  
c-Jun

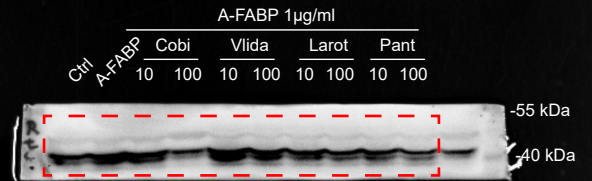

Figure 3A  
RAW264.7  
β-actin

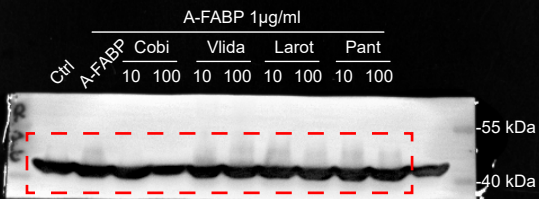

Electronic Supplementary Information

Figure 3A-The uncropped and unprocessed image of the full blot

Figure 3A  
Primary Macrophages  
p-JNK

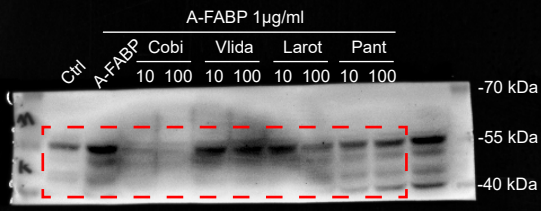

Figure 3A  
Primary Macrophages  
JNK

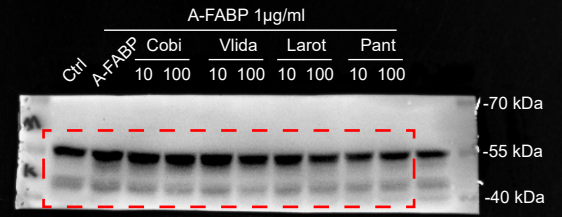

Figure 3A  
Primary Macrophages  
p-c-Jun

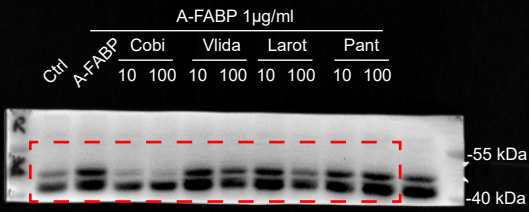

Figure 3A  
Primary Macrophages  
c-Jun

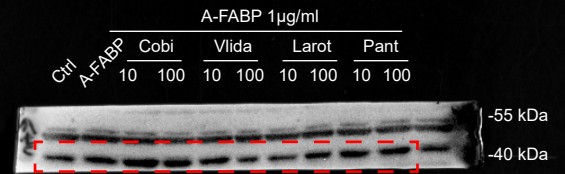

Figure 3A  
Primary Macrophages  
 $\beta$ -actin

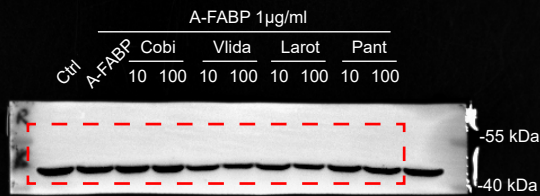

Electronic Supplementary Information

Figure 4A-The uncropped and unprocessed image of the full blot

Figure 4A  
RAW264.7  
p-JNK

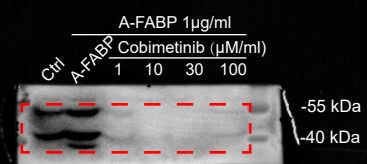

Figure 4A  
RAW264.7  
JNK

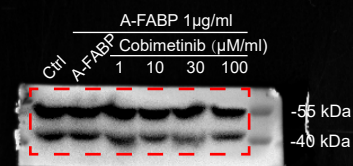

Figure 4A  
RAW264.7  
p-c-Jun

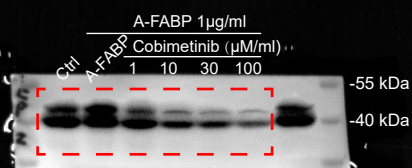

Figure 4A  
RAW264.7  
c-Jun

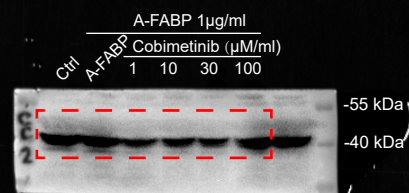

Figure 4A  
RAW264.7  
β-actin

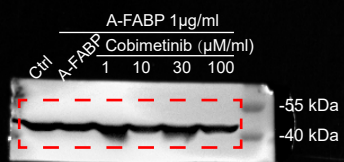

Supplement: d2ra01057g1.pdf [file d2ra01057g1.pdf]
